# Supplementary material for: Front-Line Therapy in EGFR Exon 19 Deletion and 21 Leu858Arg Mutations in Advanced Non-Small Cell Lung Cancer: A Network Meta-Analysis
Source: Hindawi journal article supplement (doi:10.1155/2021/9311875), 2021-12-13

## **Figure S1 Trace plot, Density plot and convergence diagnostics plot for Network Meta Analysis**

The number from 1 to 10 in the title of trace plot, density plot and convergence diagnostics plot represents ten different treatments: 1 represents Afatinib; 2 represents Chemotherapy; 3 represents Dacomitinib; 4 represents Osimertinib; 5 represents SoC; 6 represents SoC+Afatinib; 7 represents SoC+Bevacizumab; 8 represents SoC+Chemotherapy; 9 represents SoC+Mono-chemotherapy; 10 represents SoC+Ramucirumab. PFS: progression free survival; OS: overall survival.

a. PFS in all patients; b. PFS in patients with 19 del mutation; c. PFS in patients with 21L858R mutation;  
d. OS in all patients; e. OS in patients with 19 del mutation; f. OS in patients with 21L858R mutation

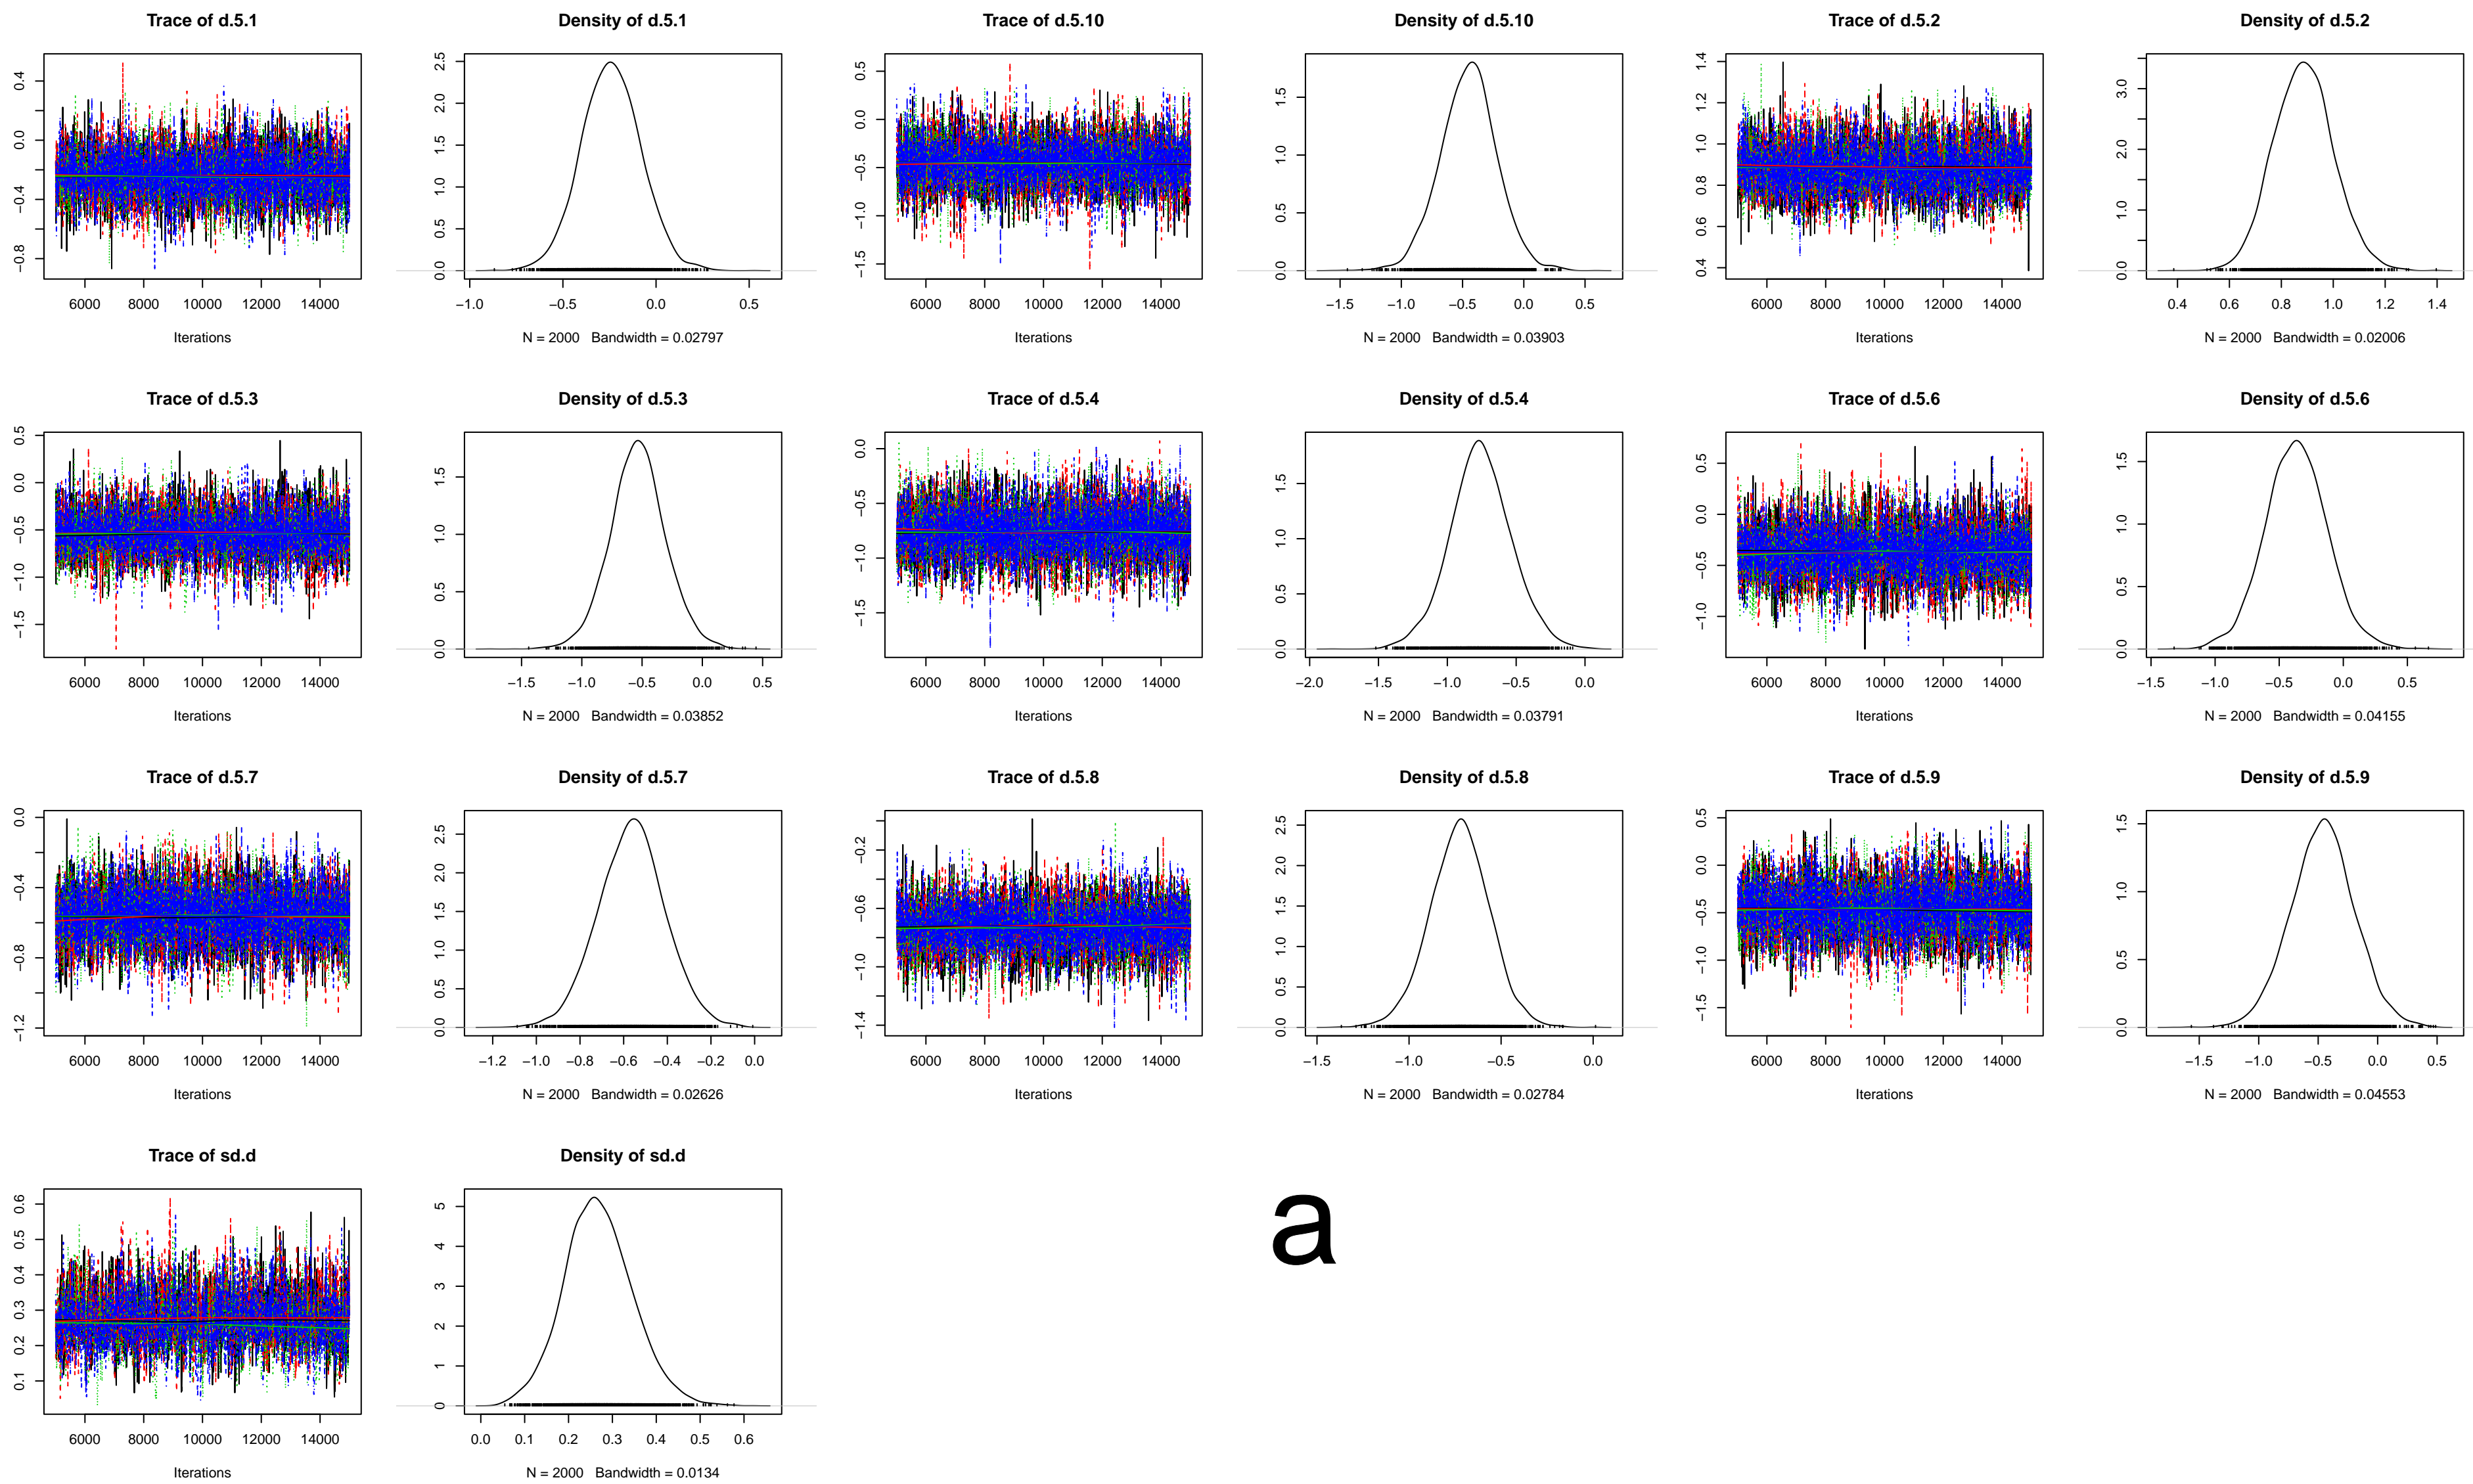

a

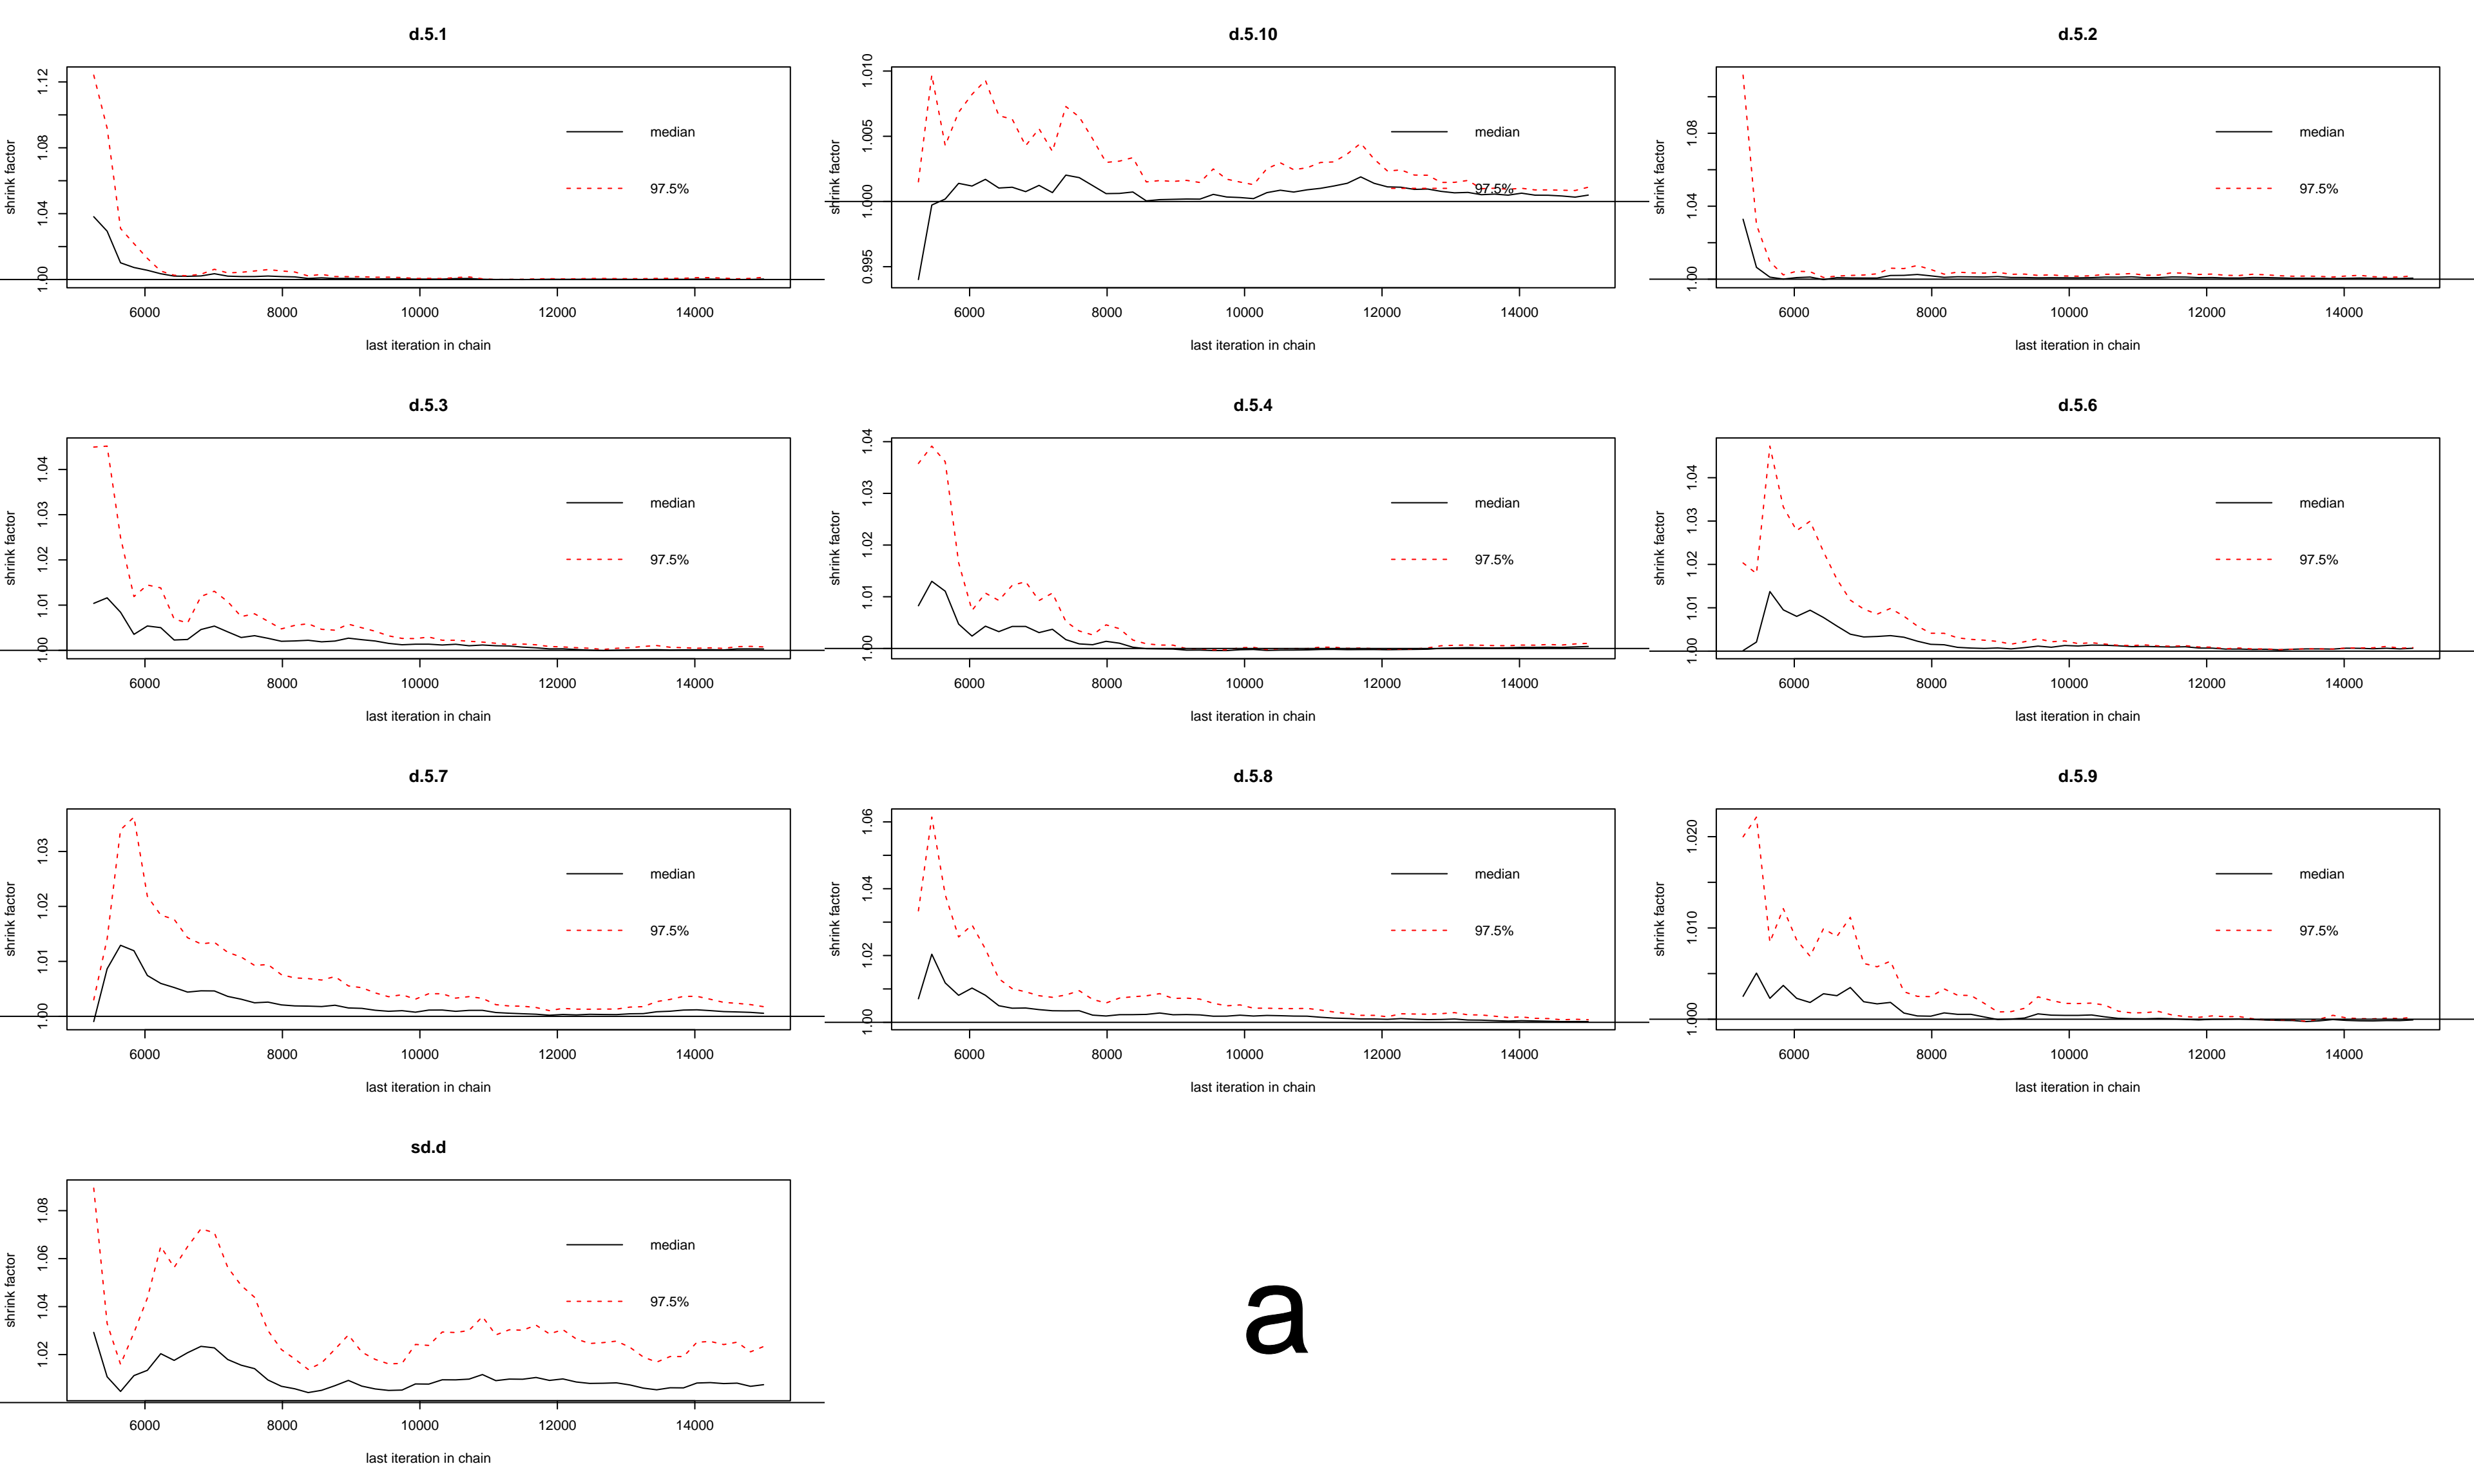

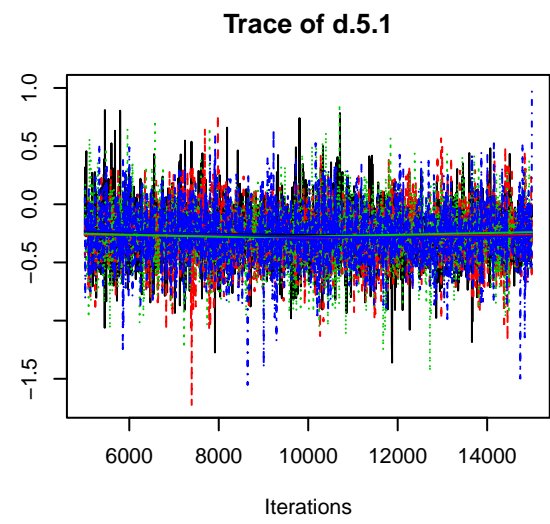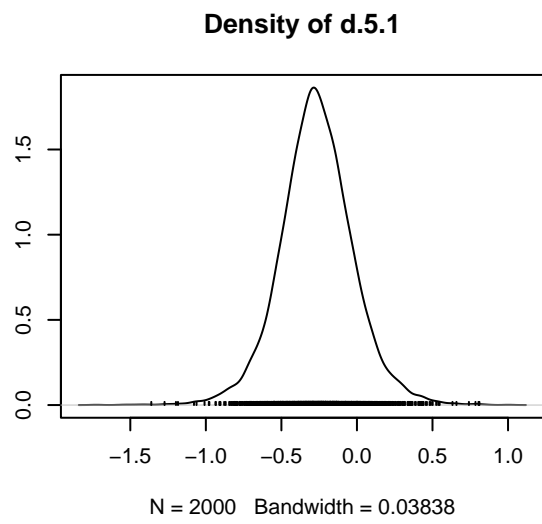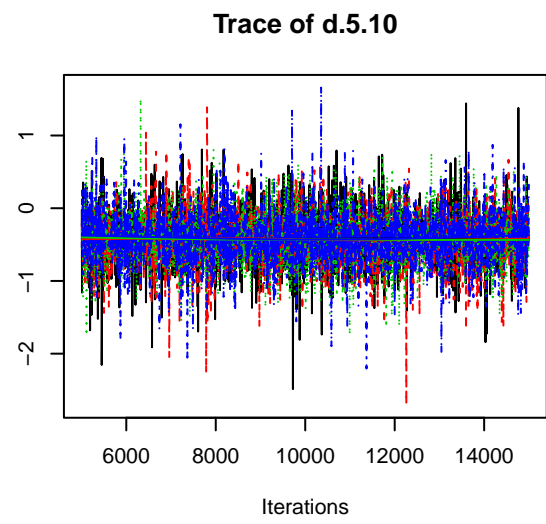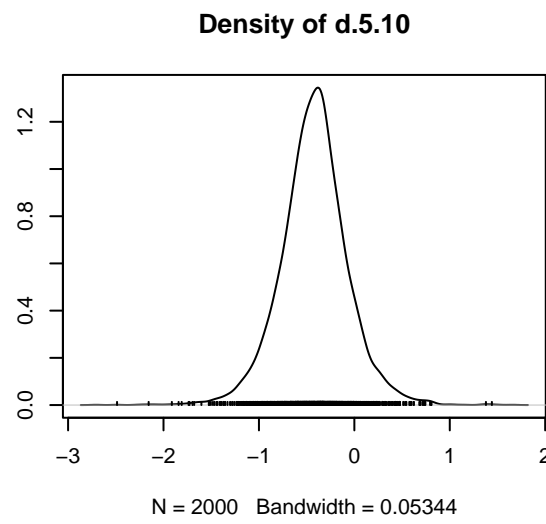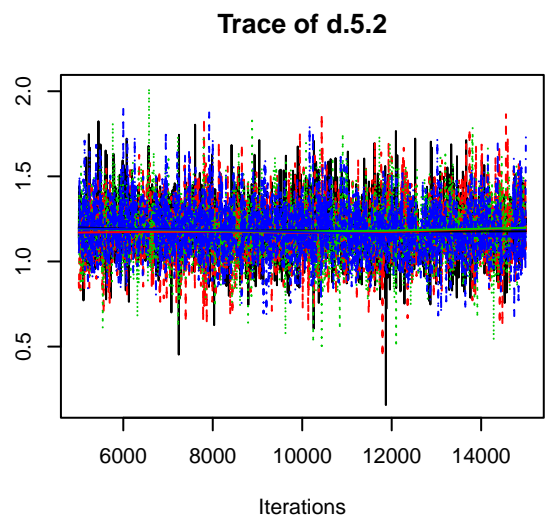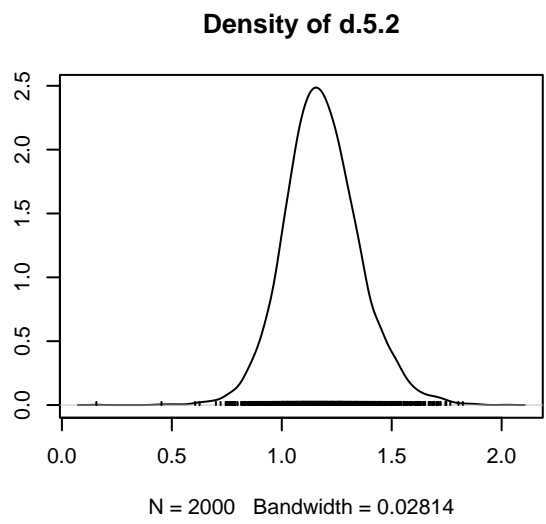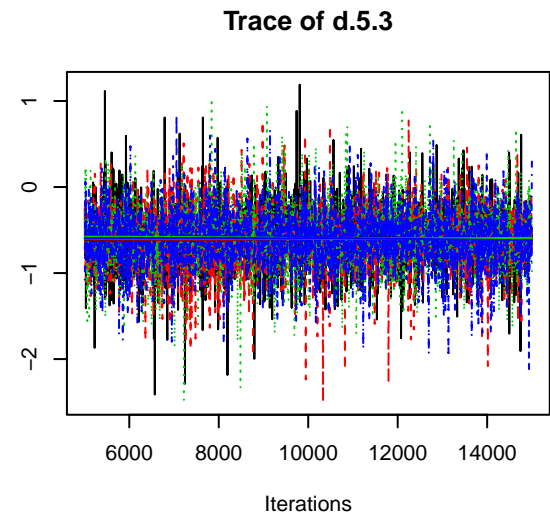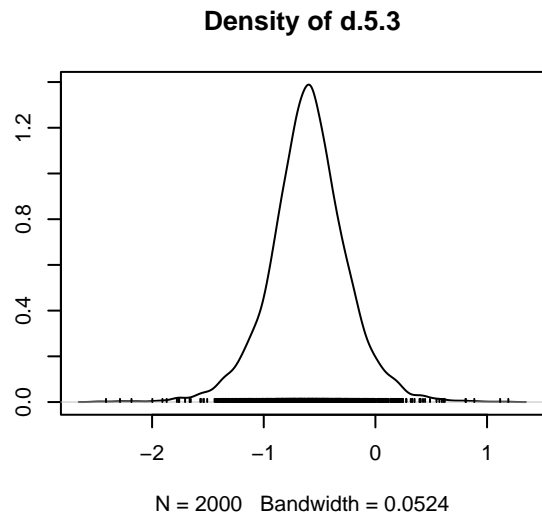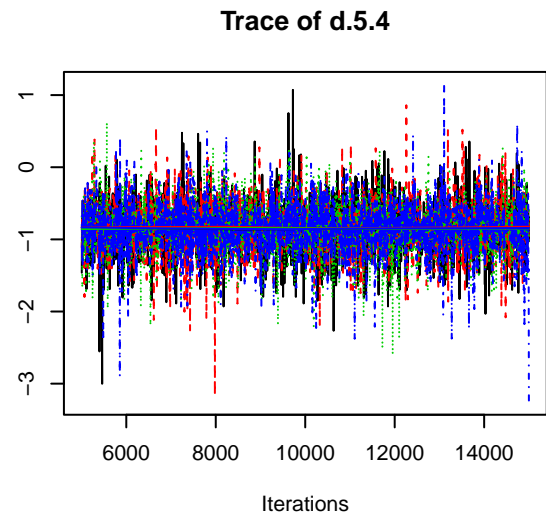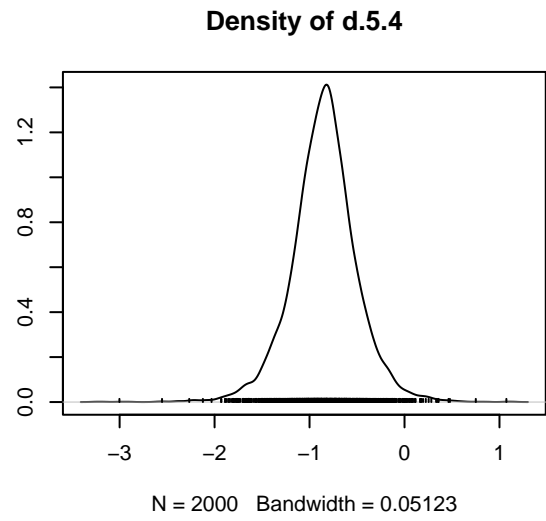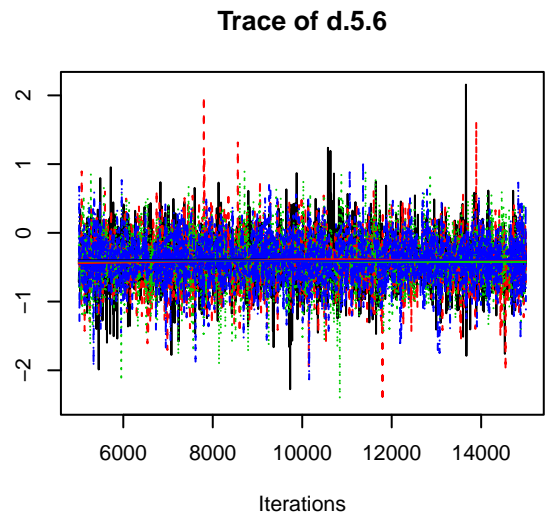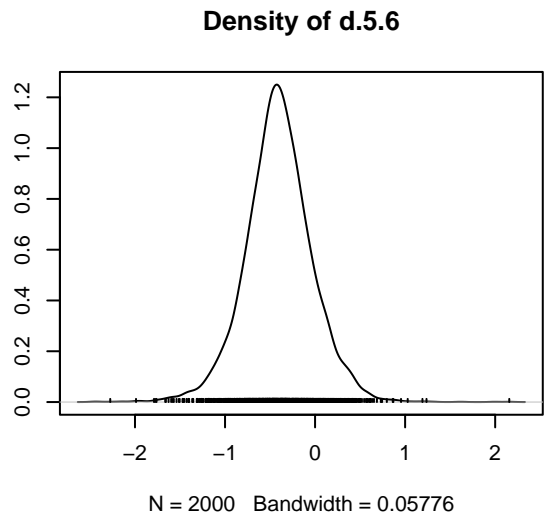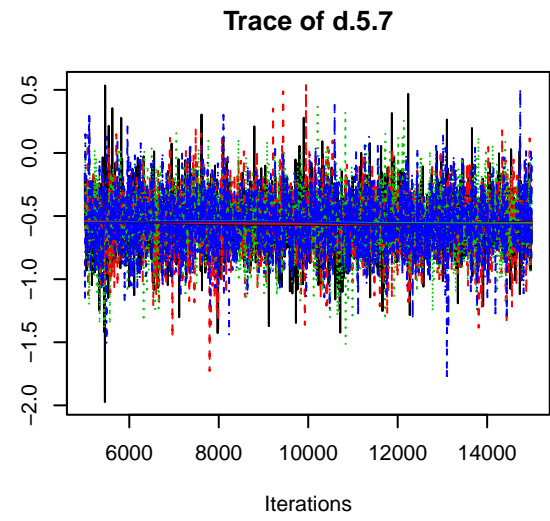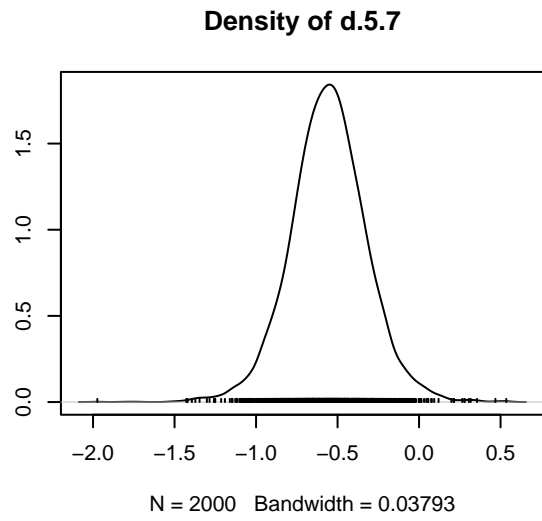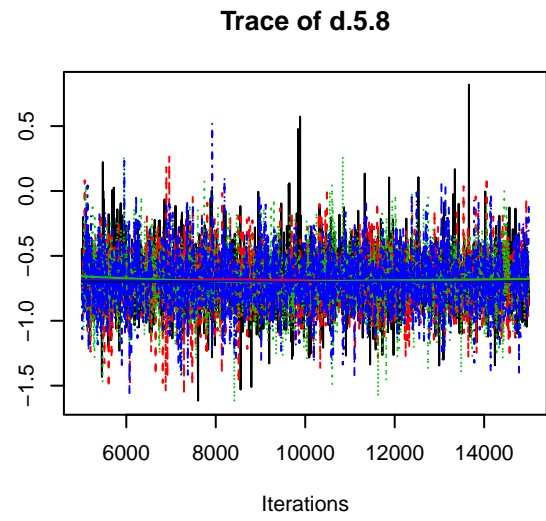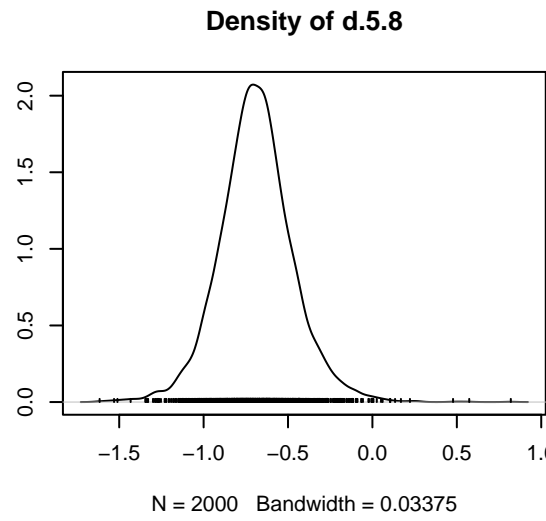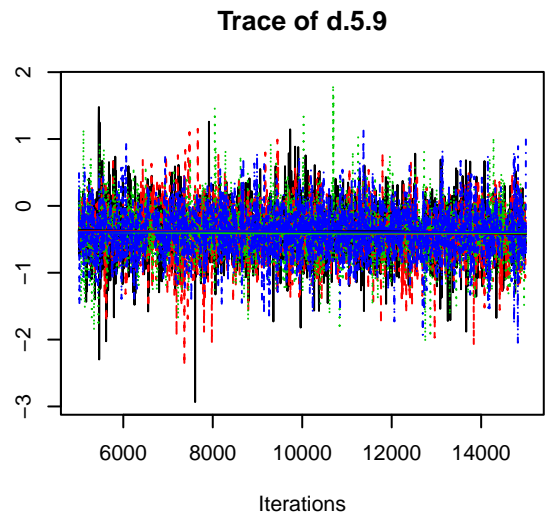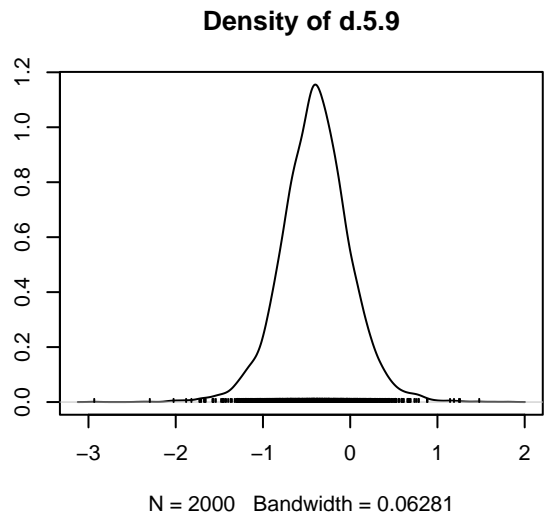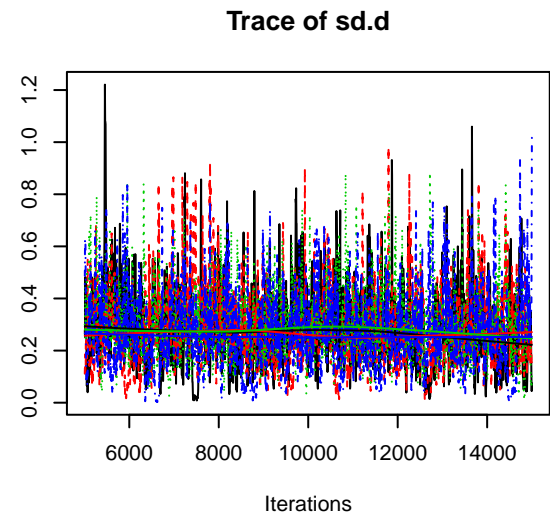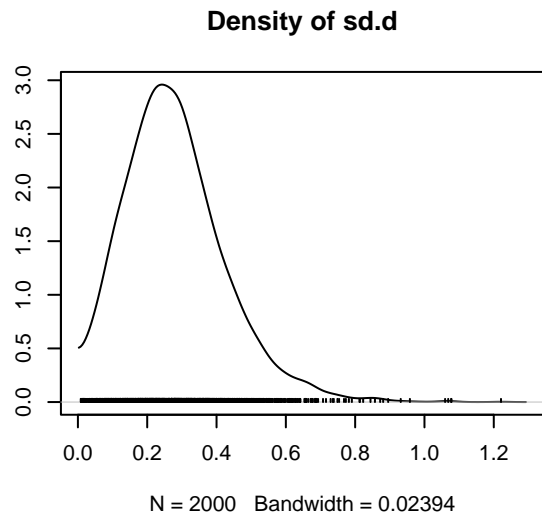

**b**



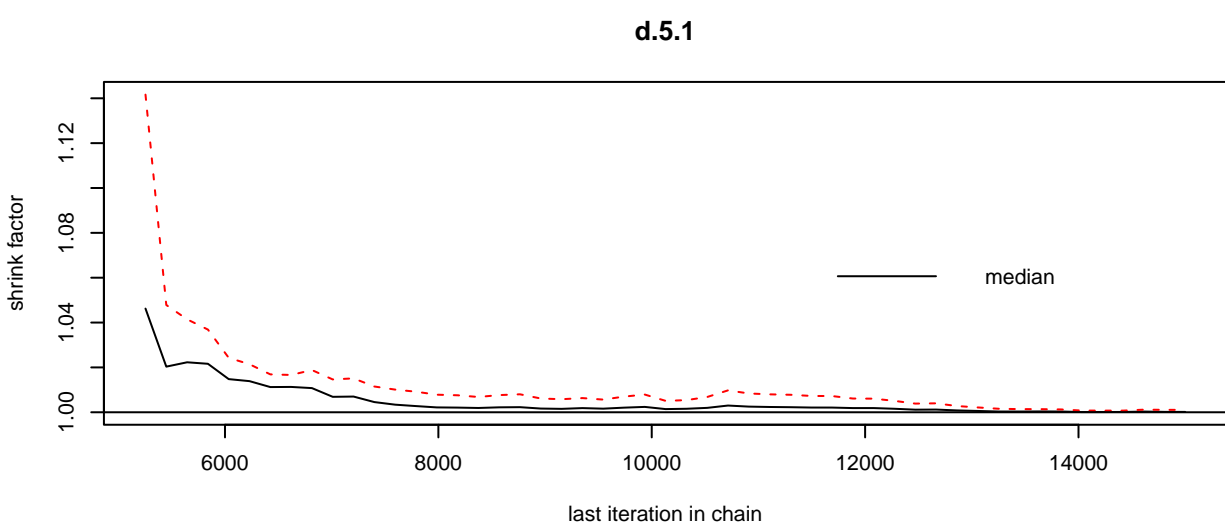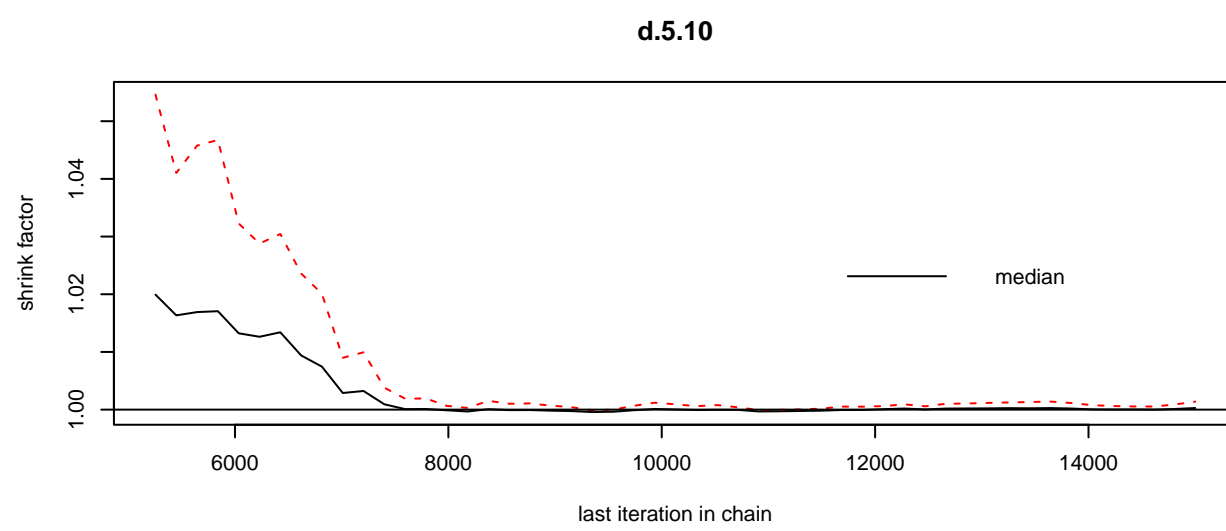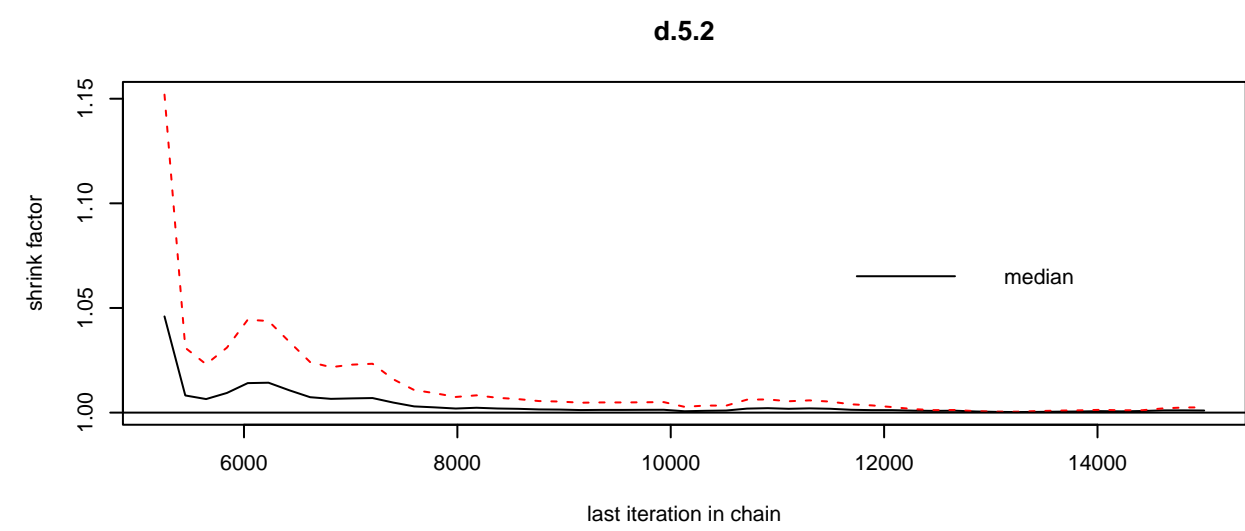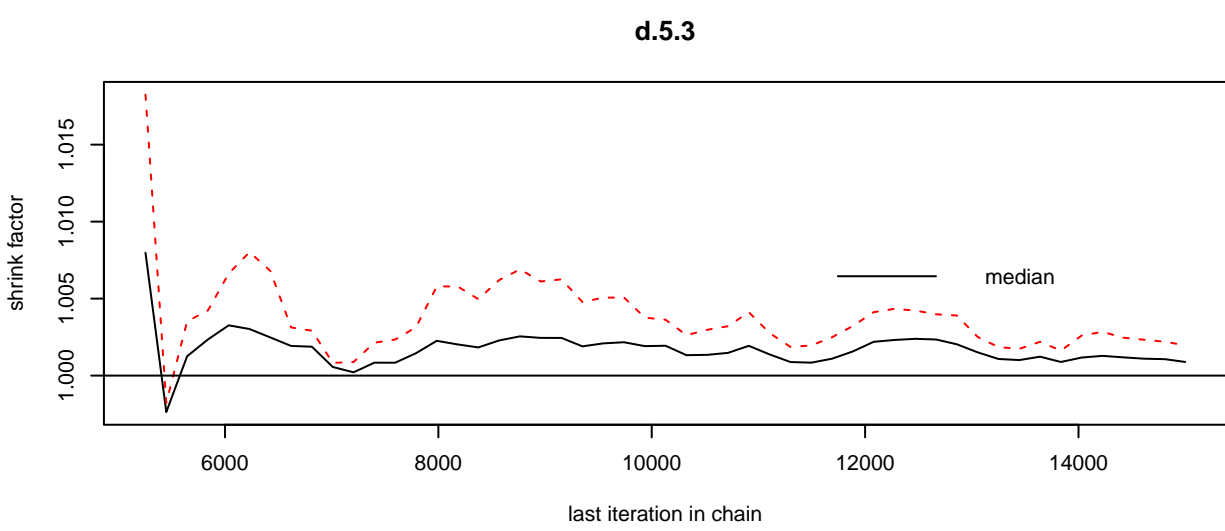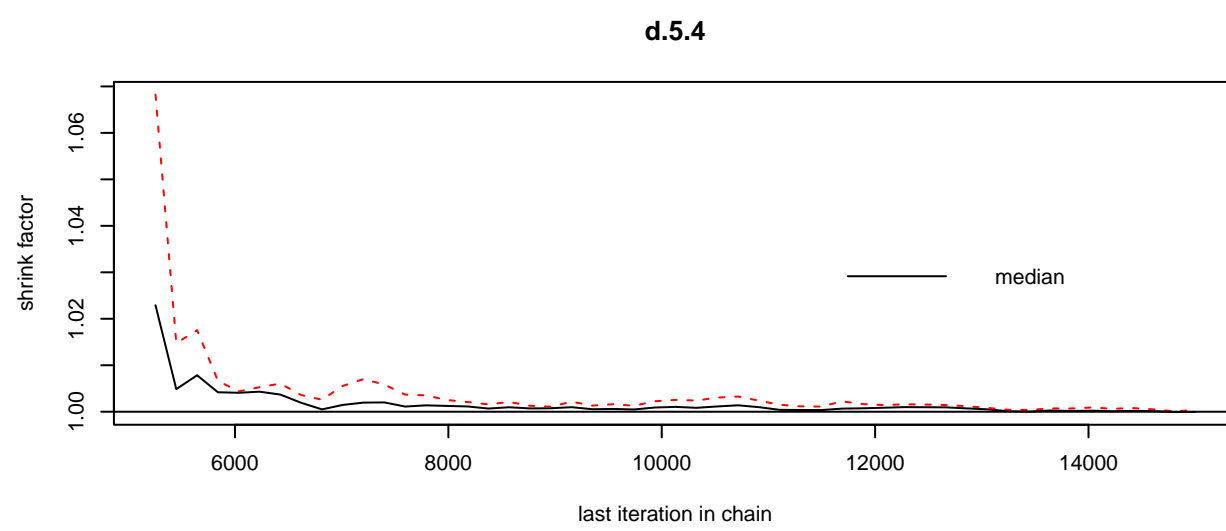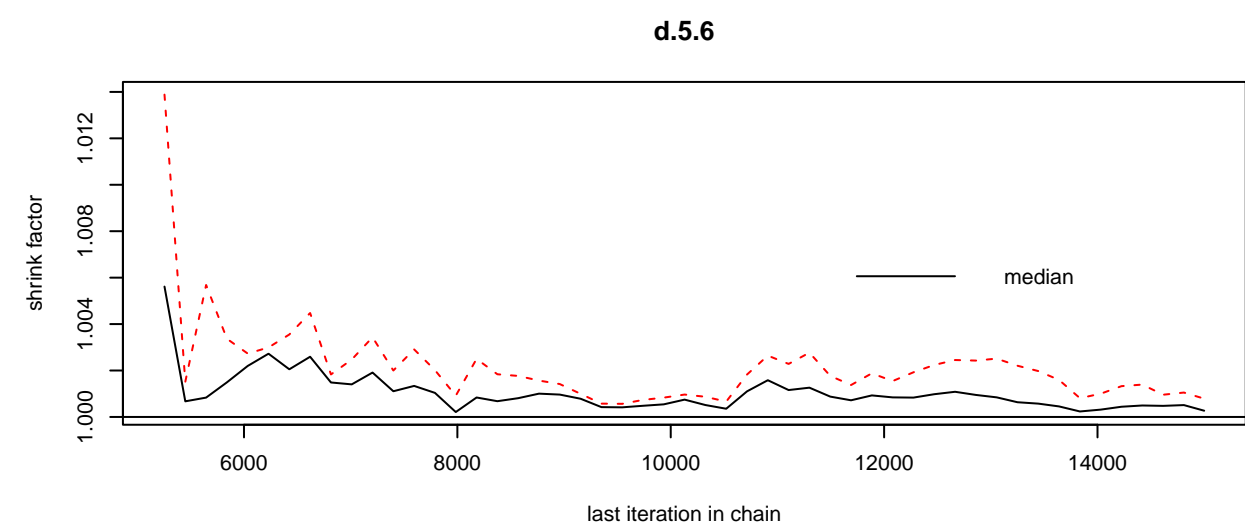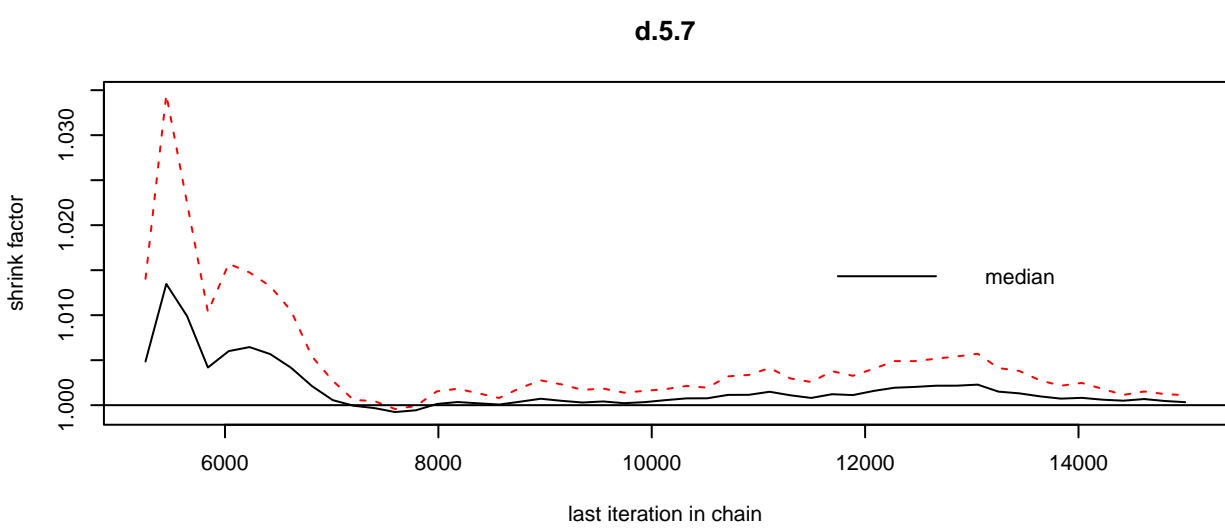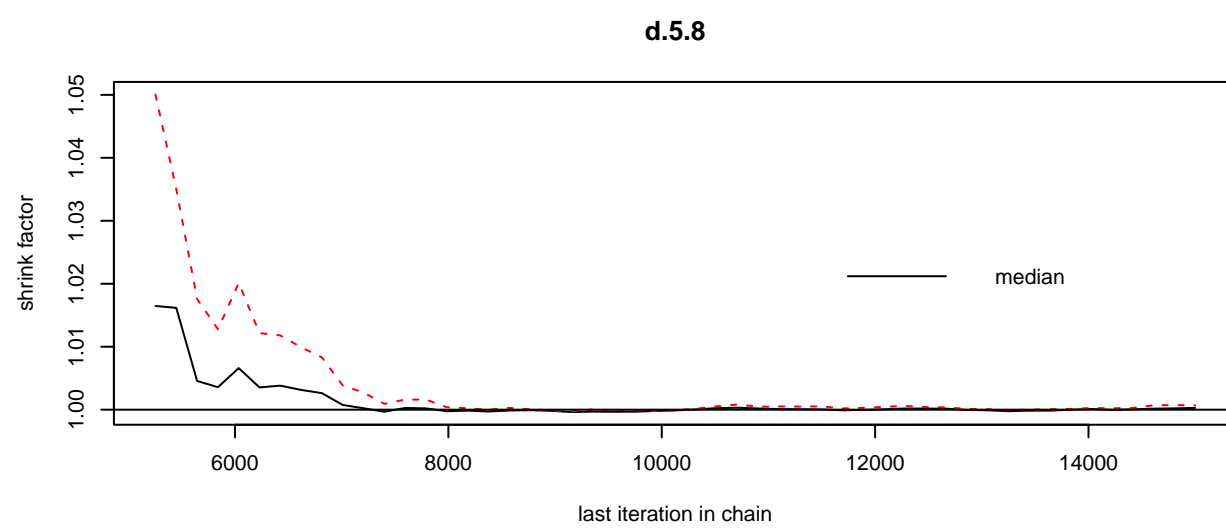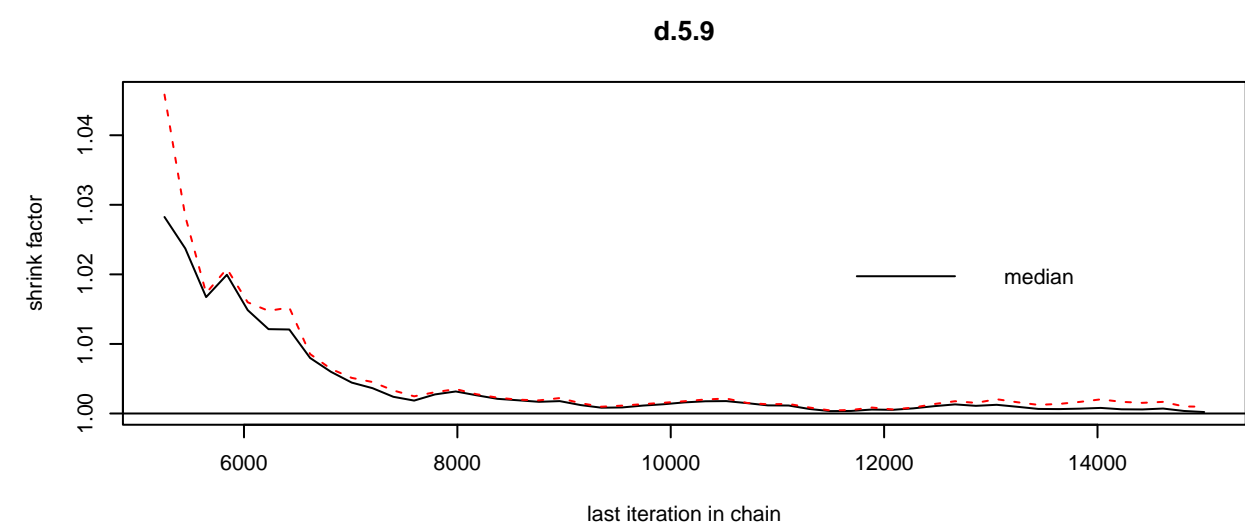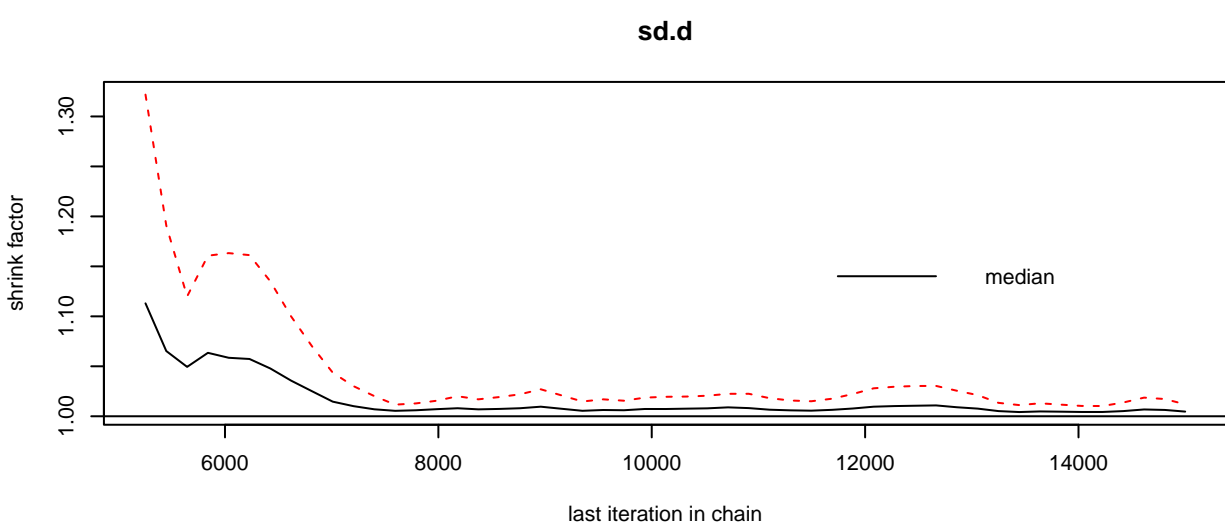

**b**

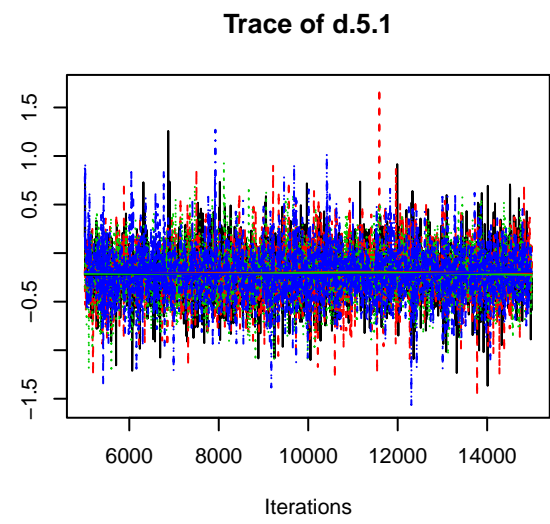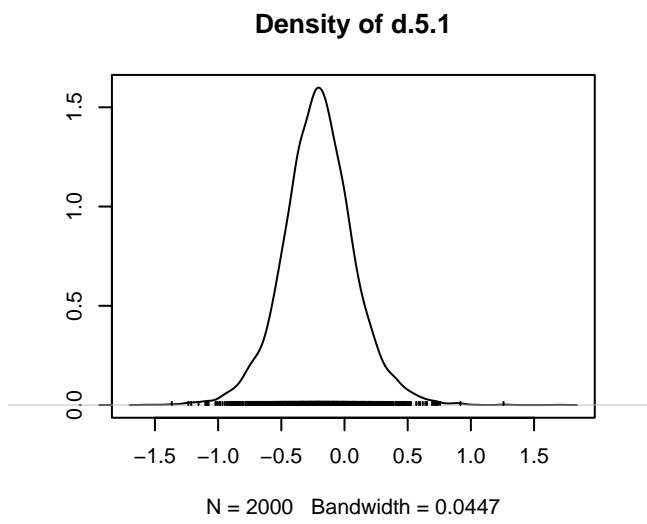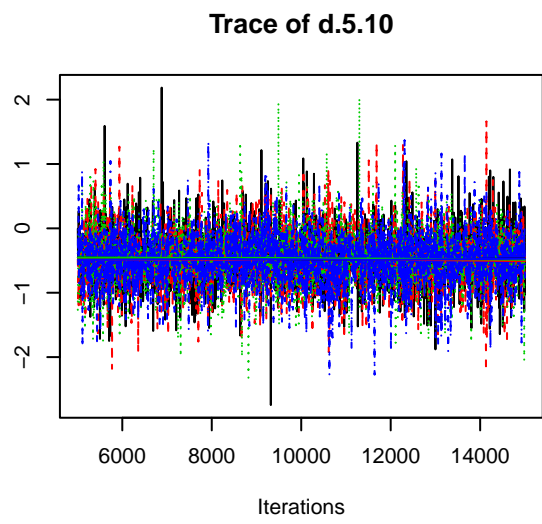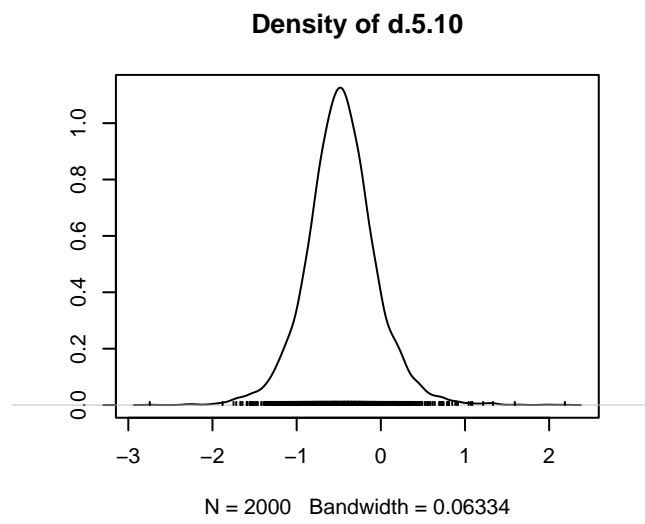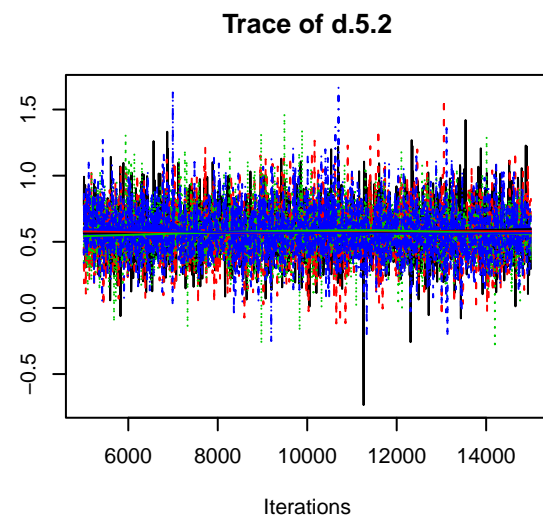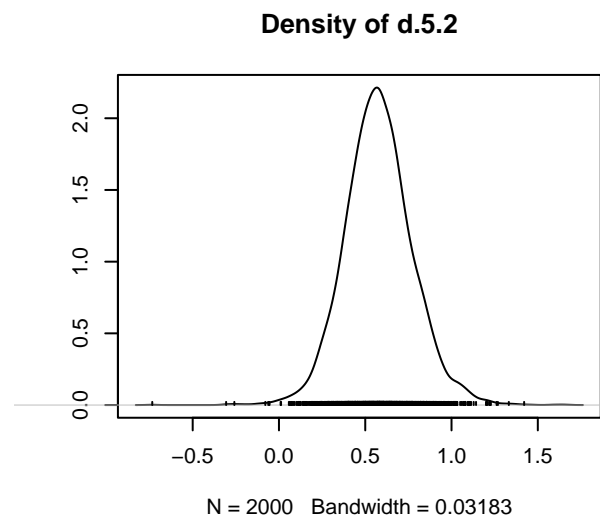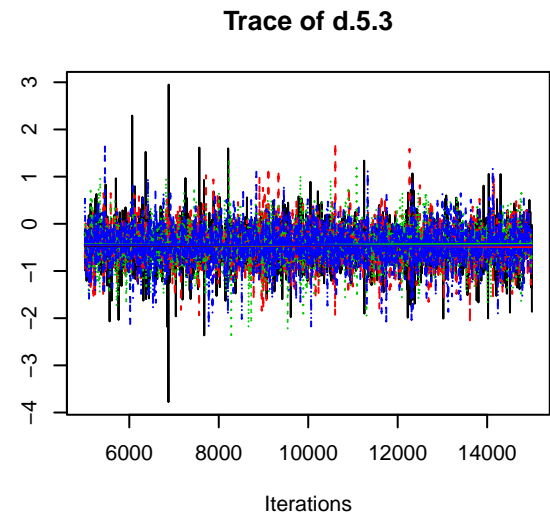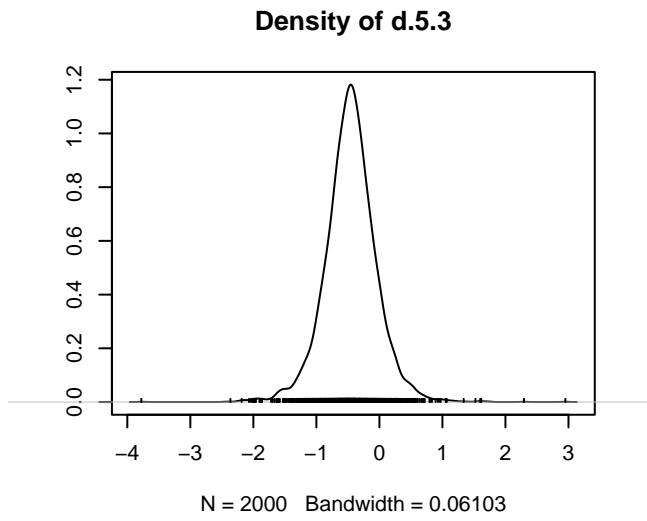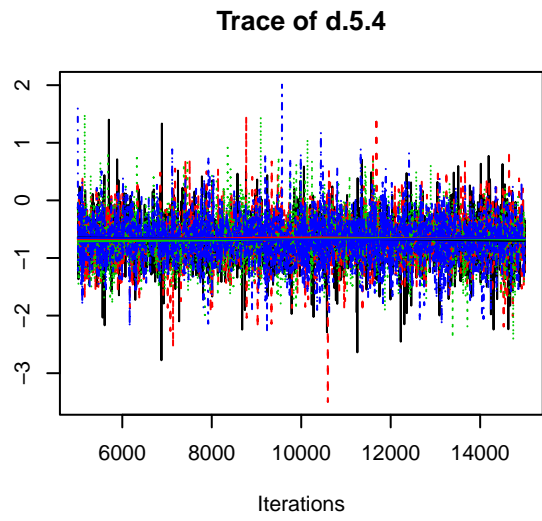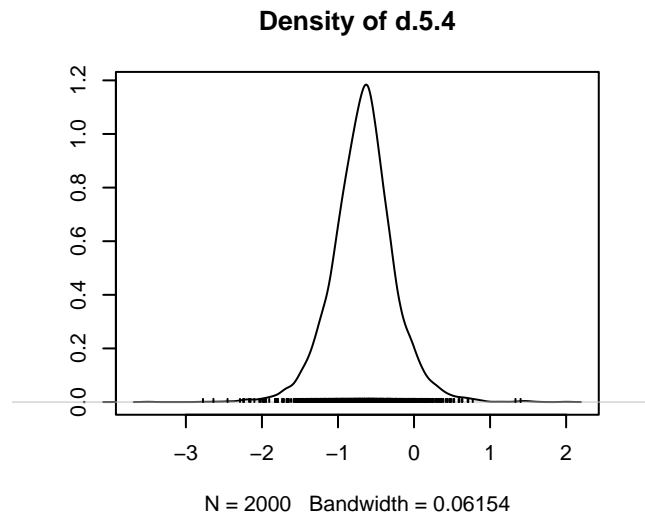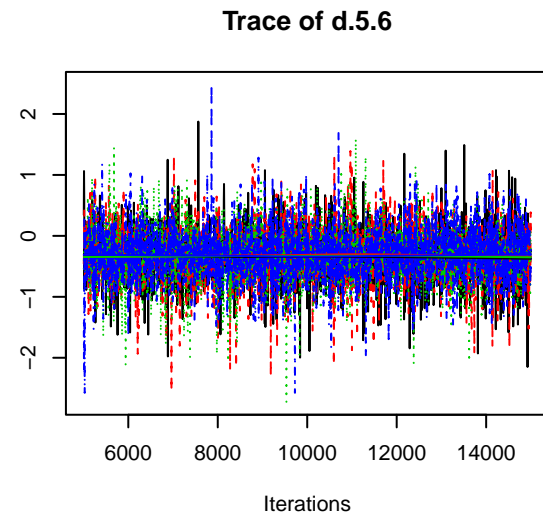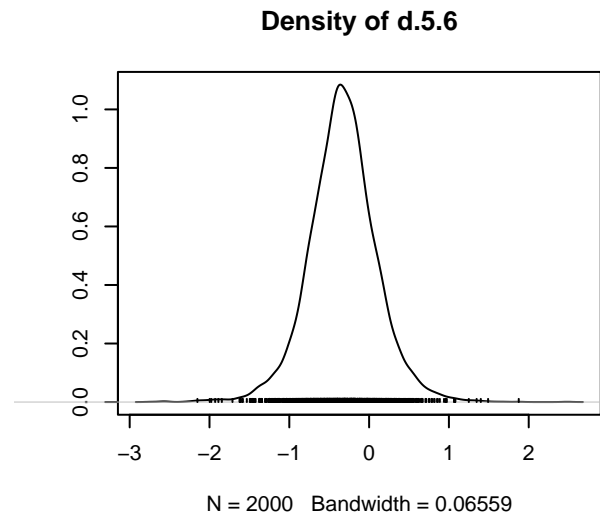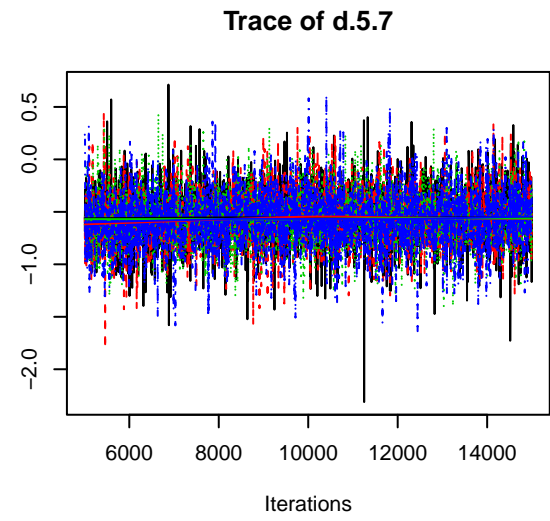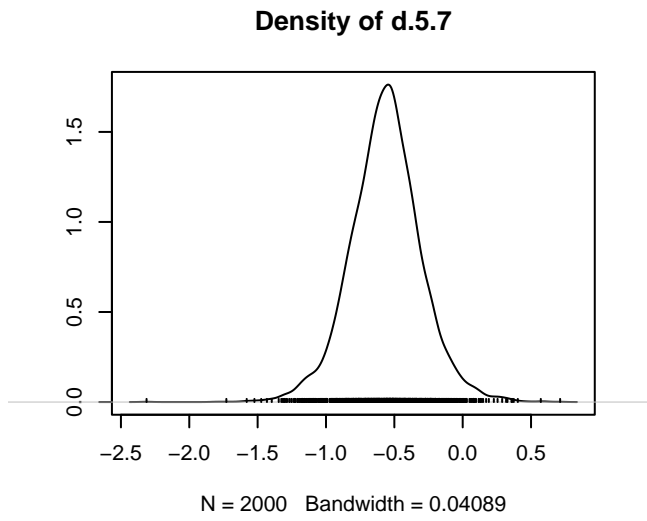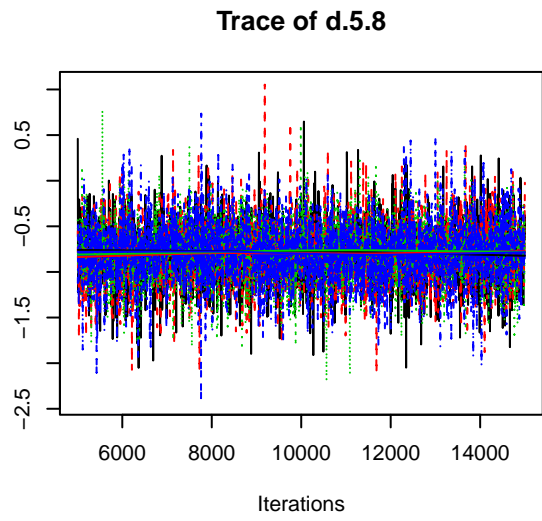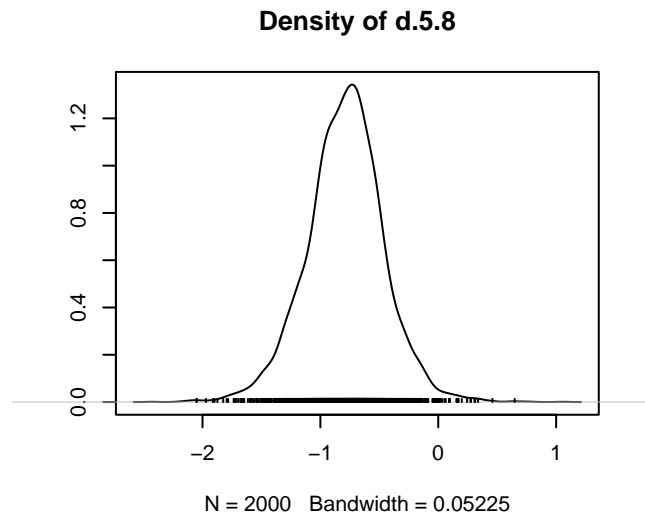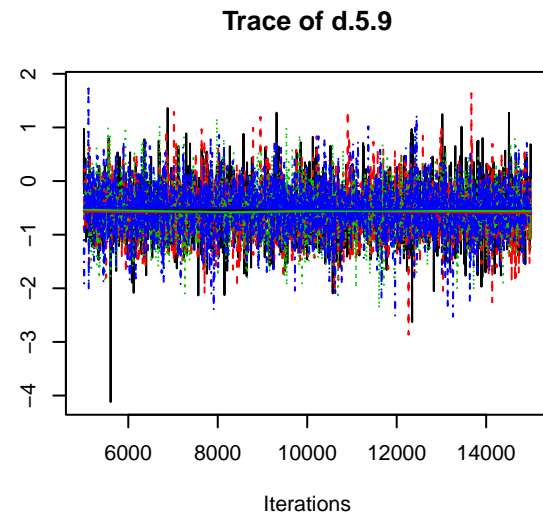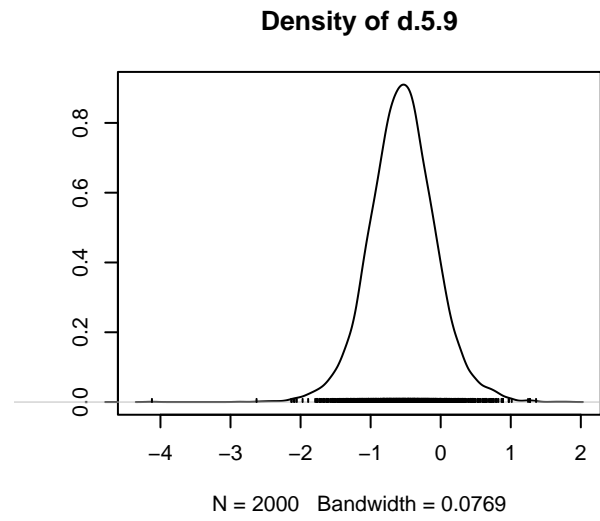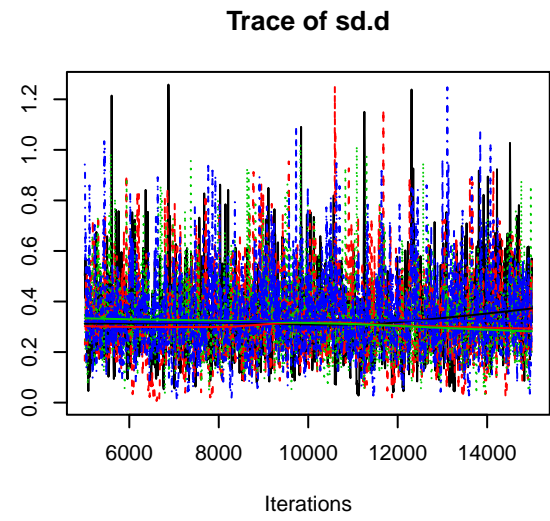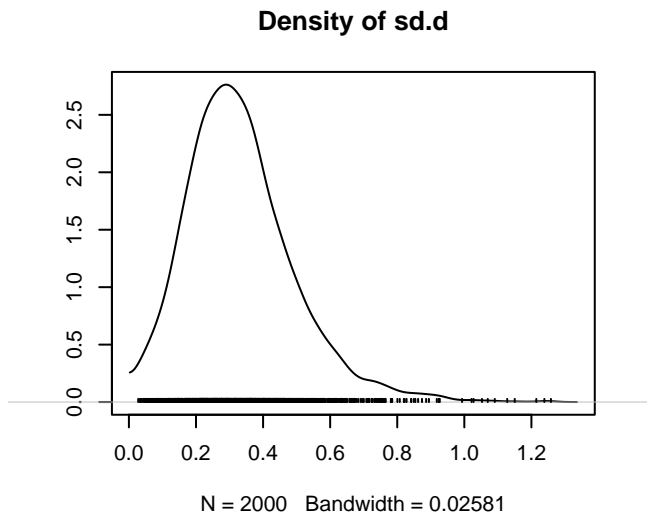

C

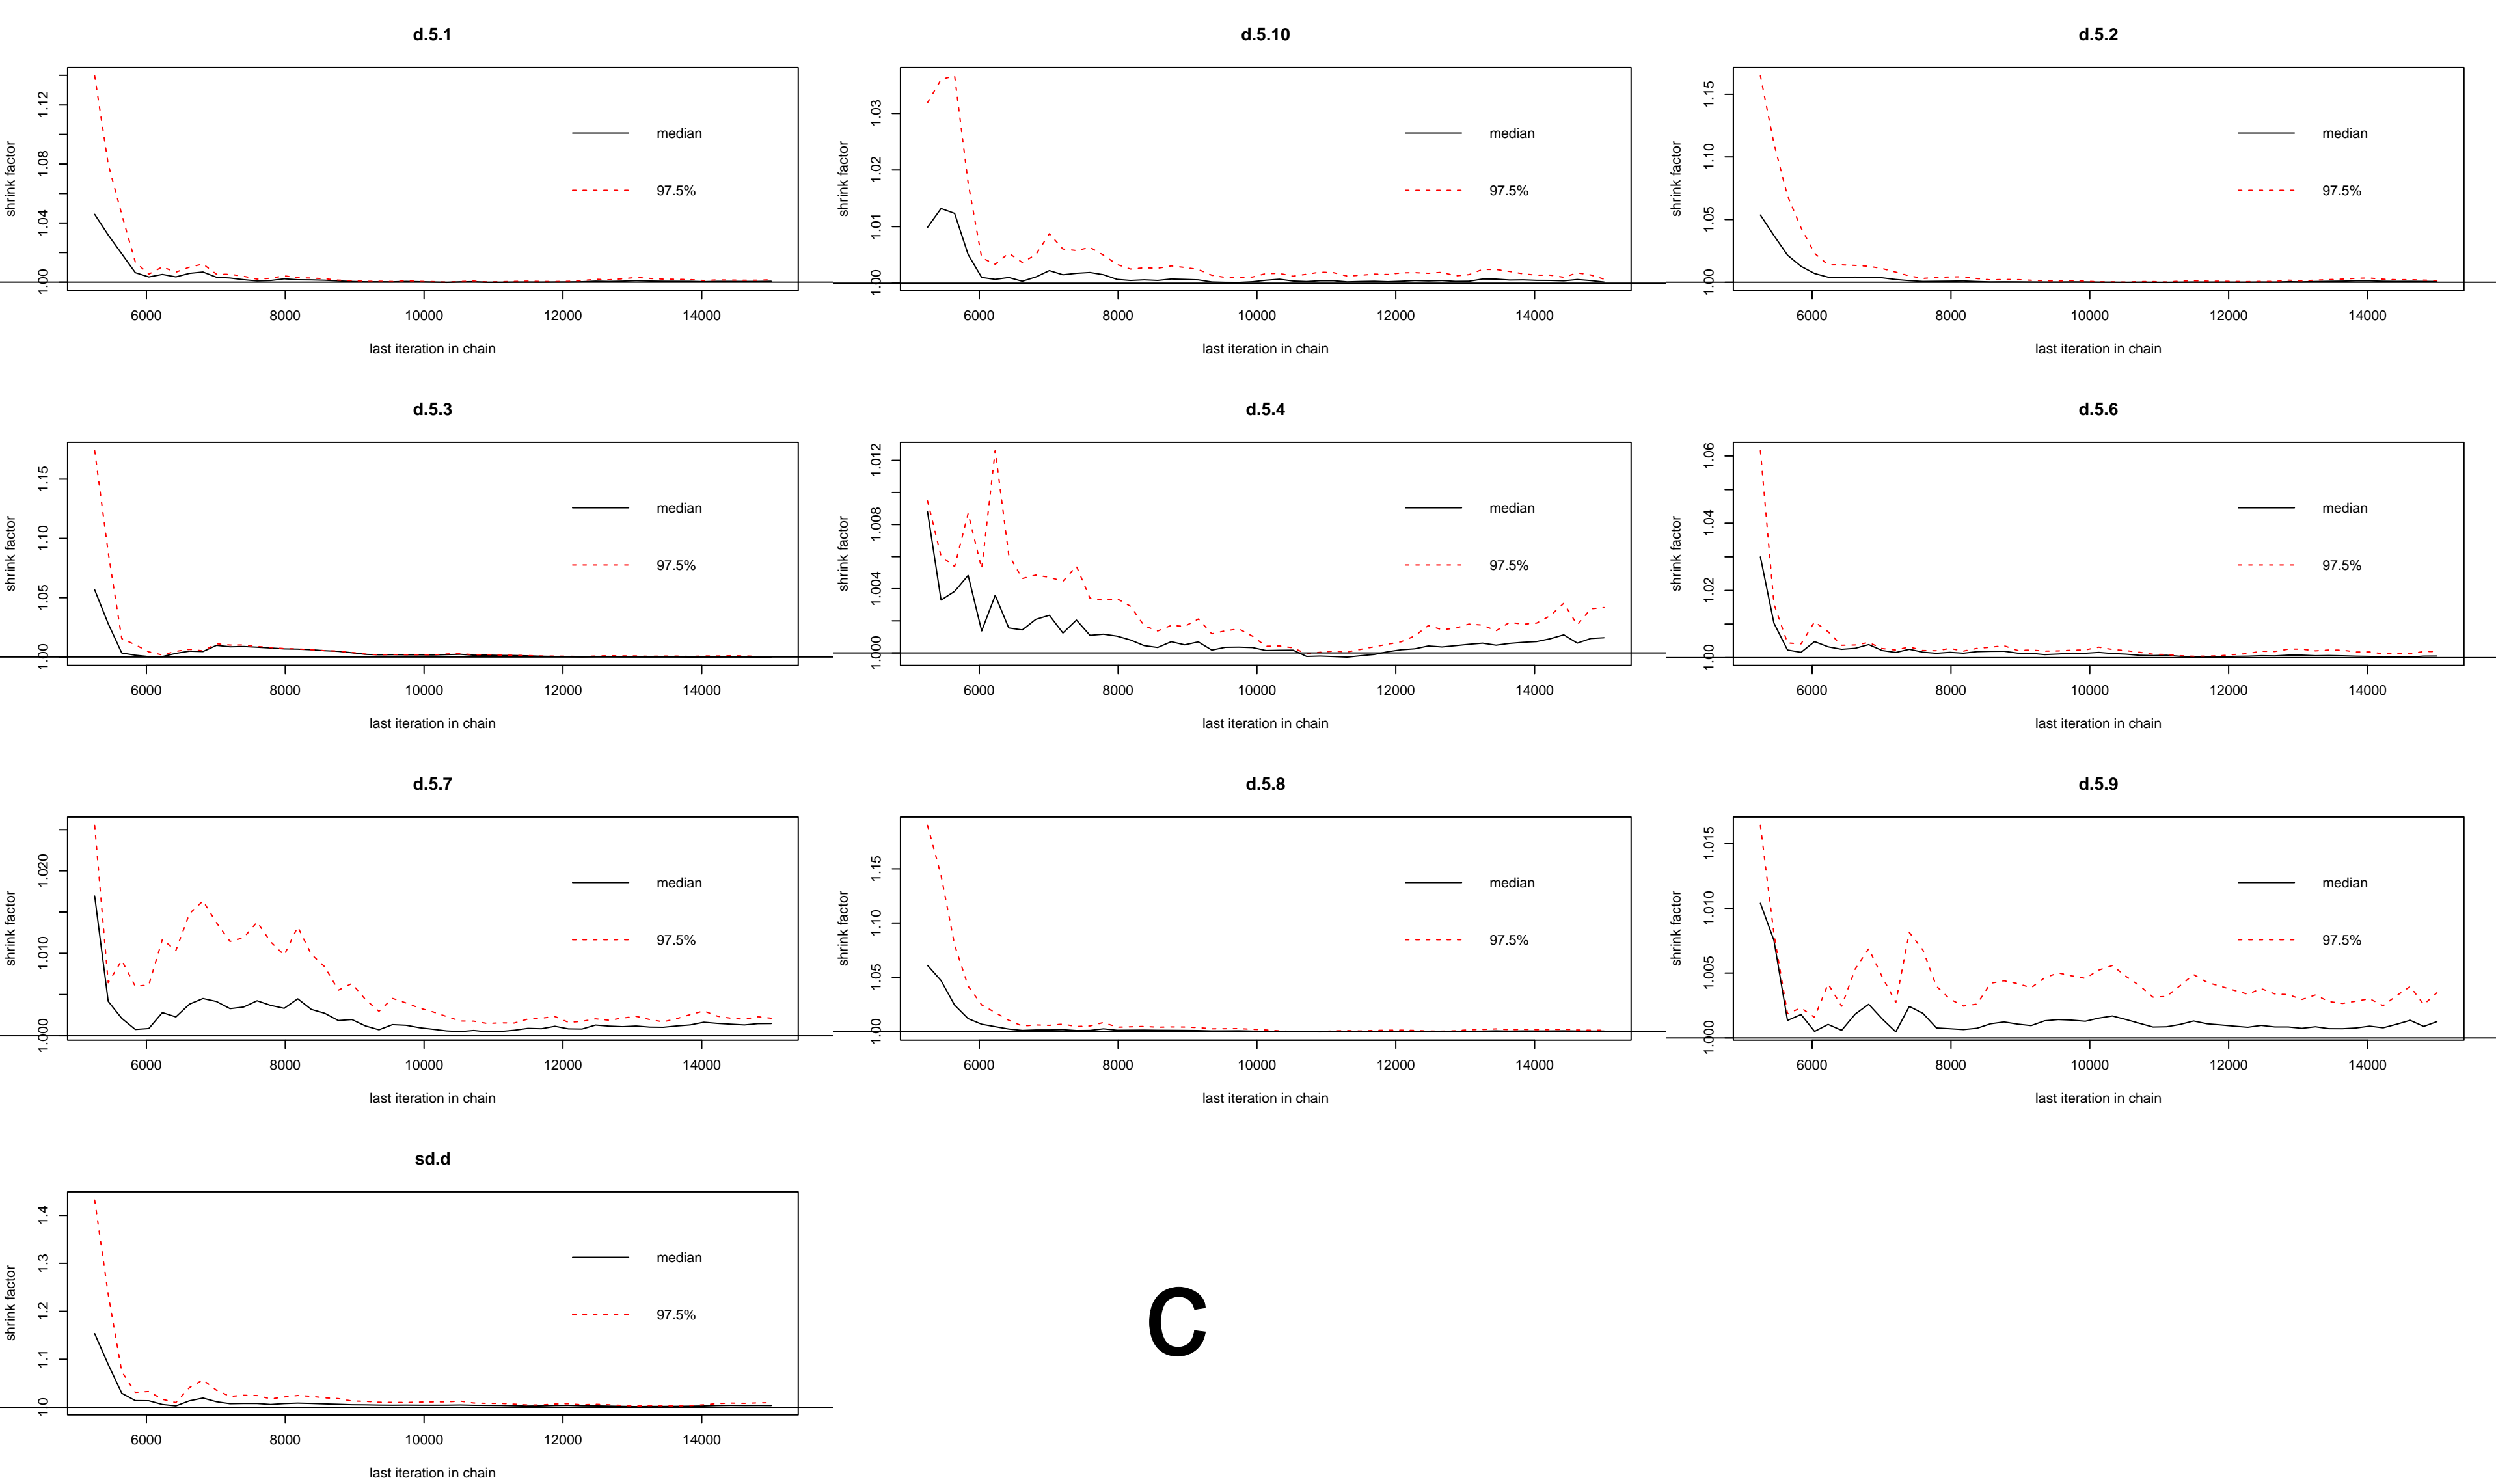

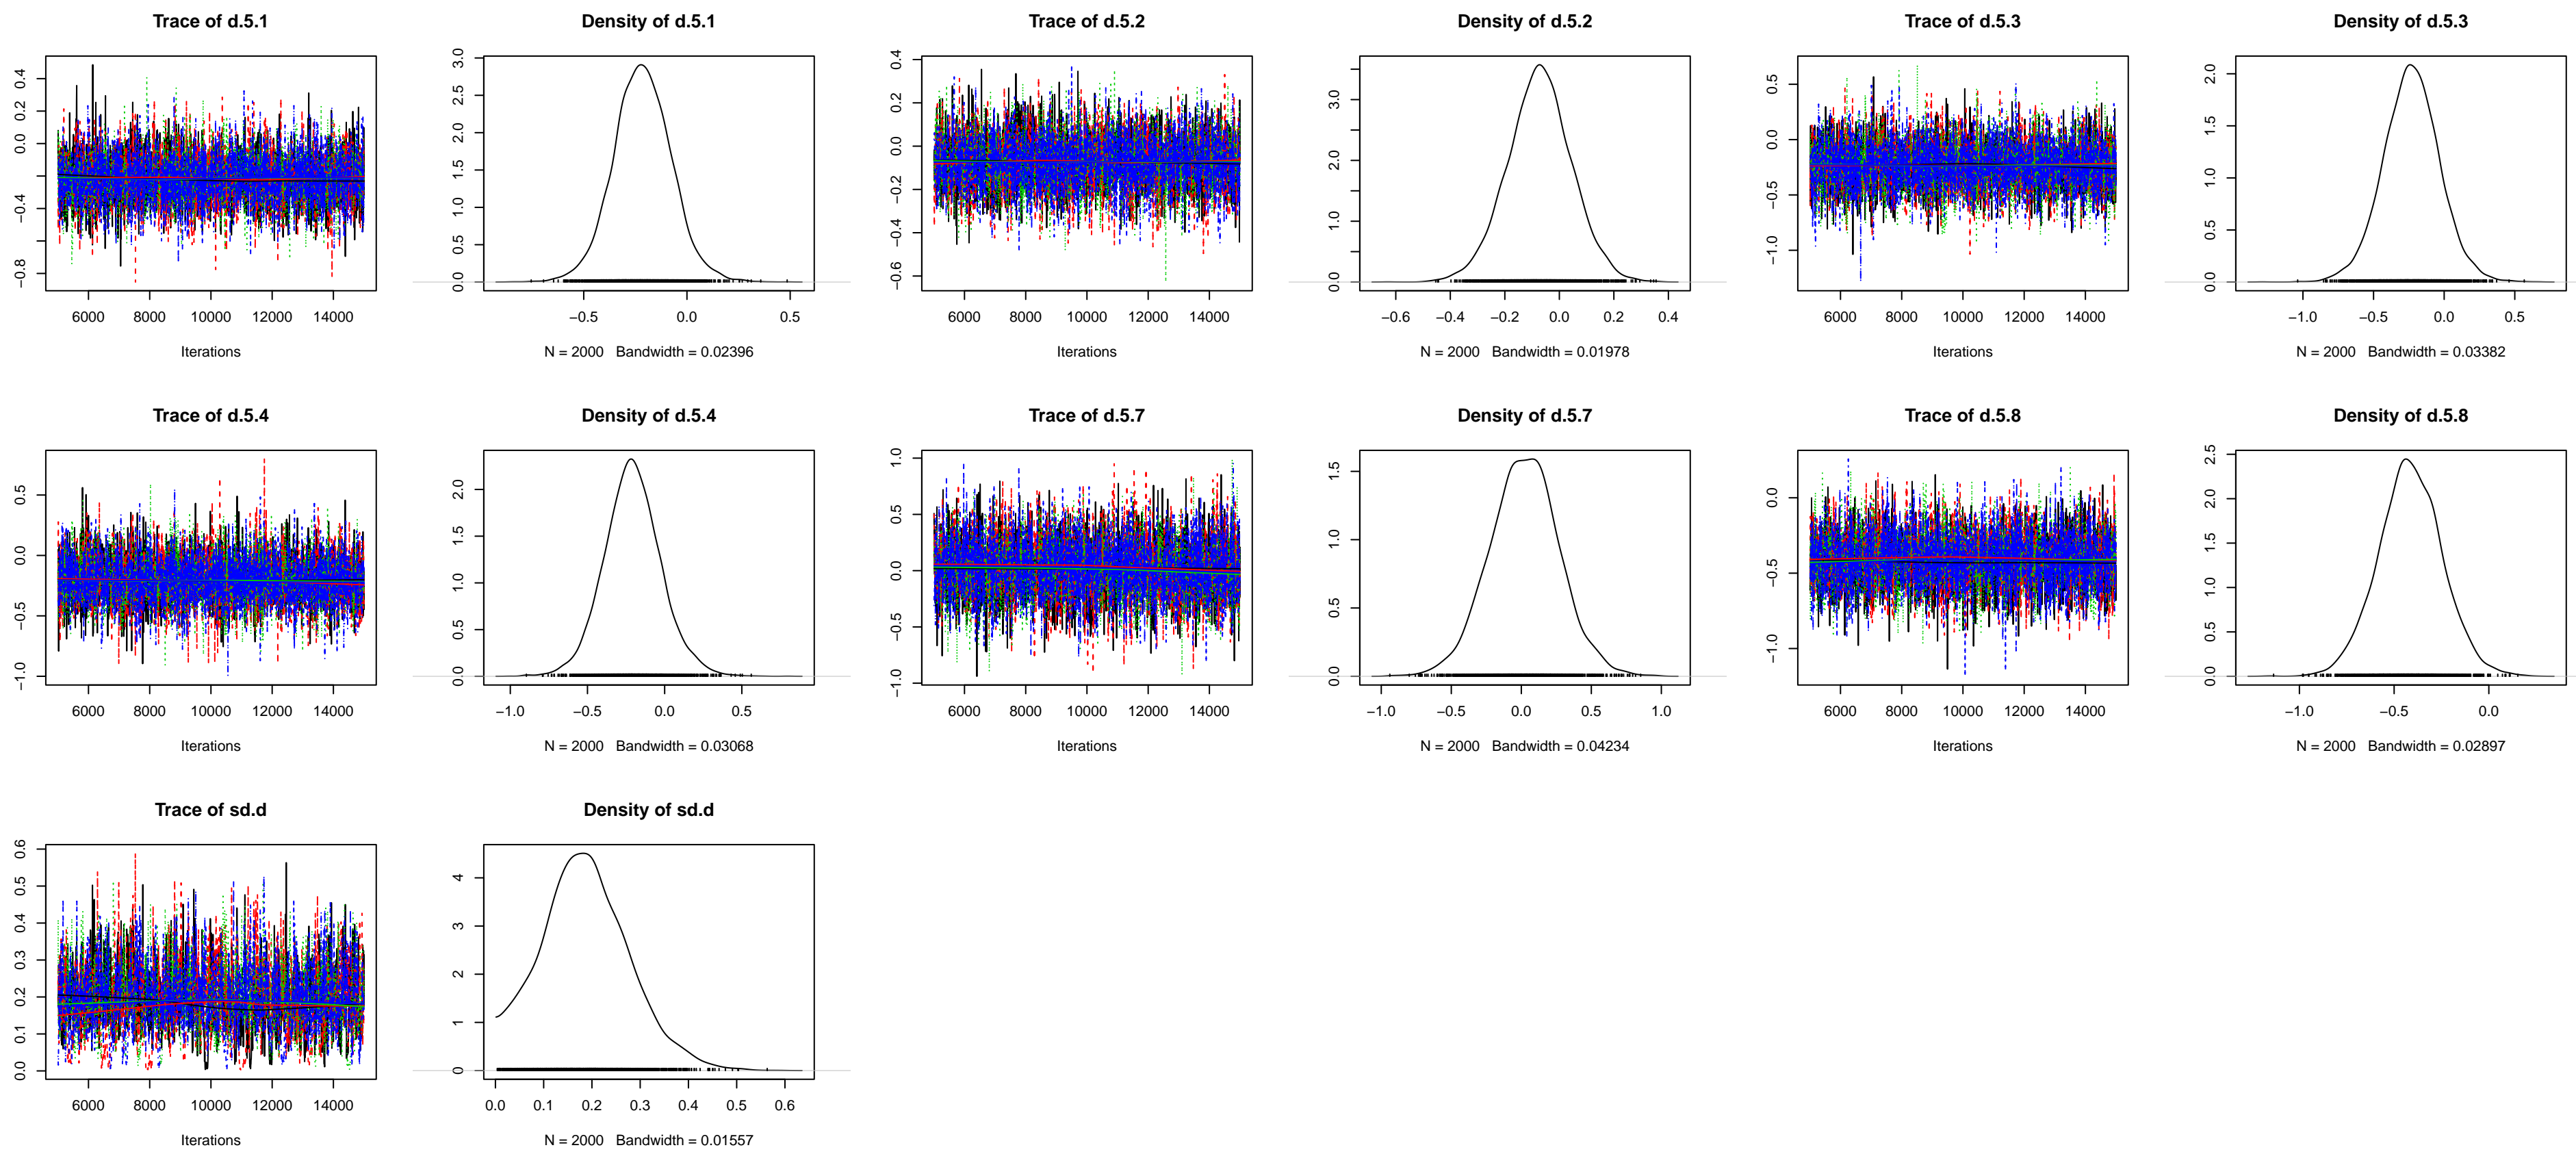

d



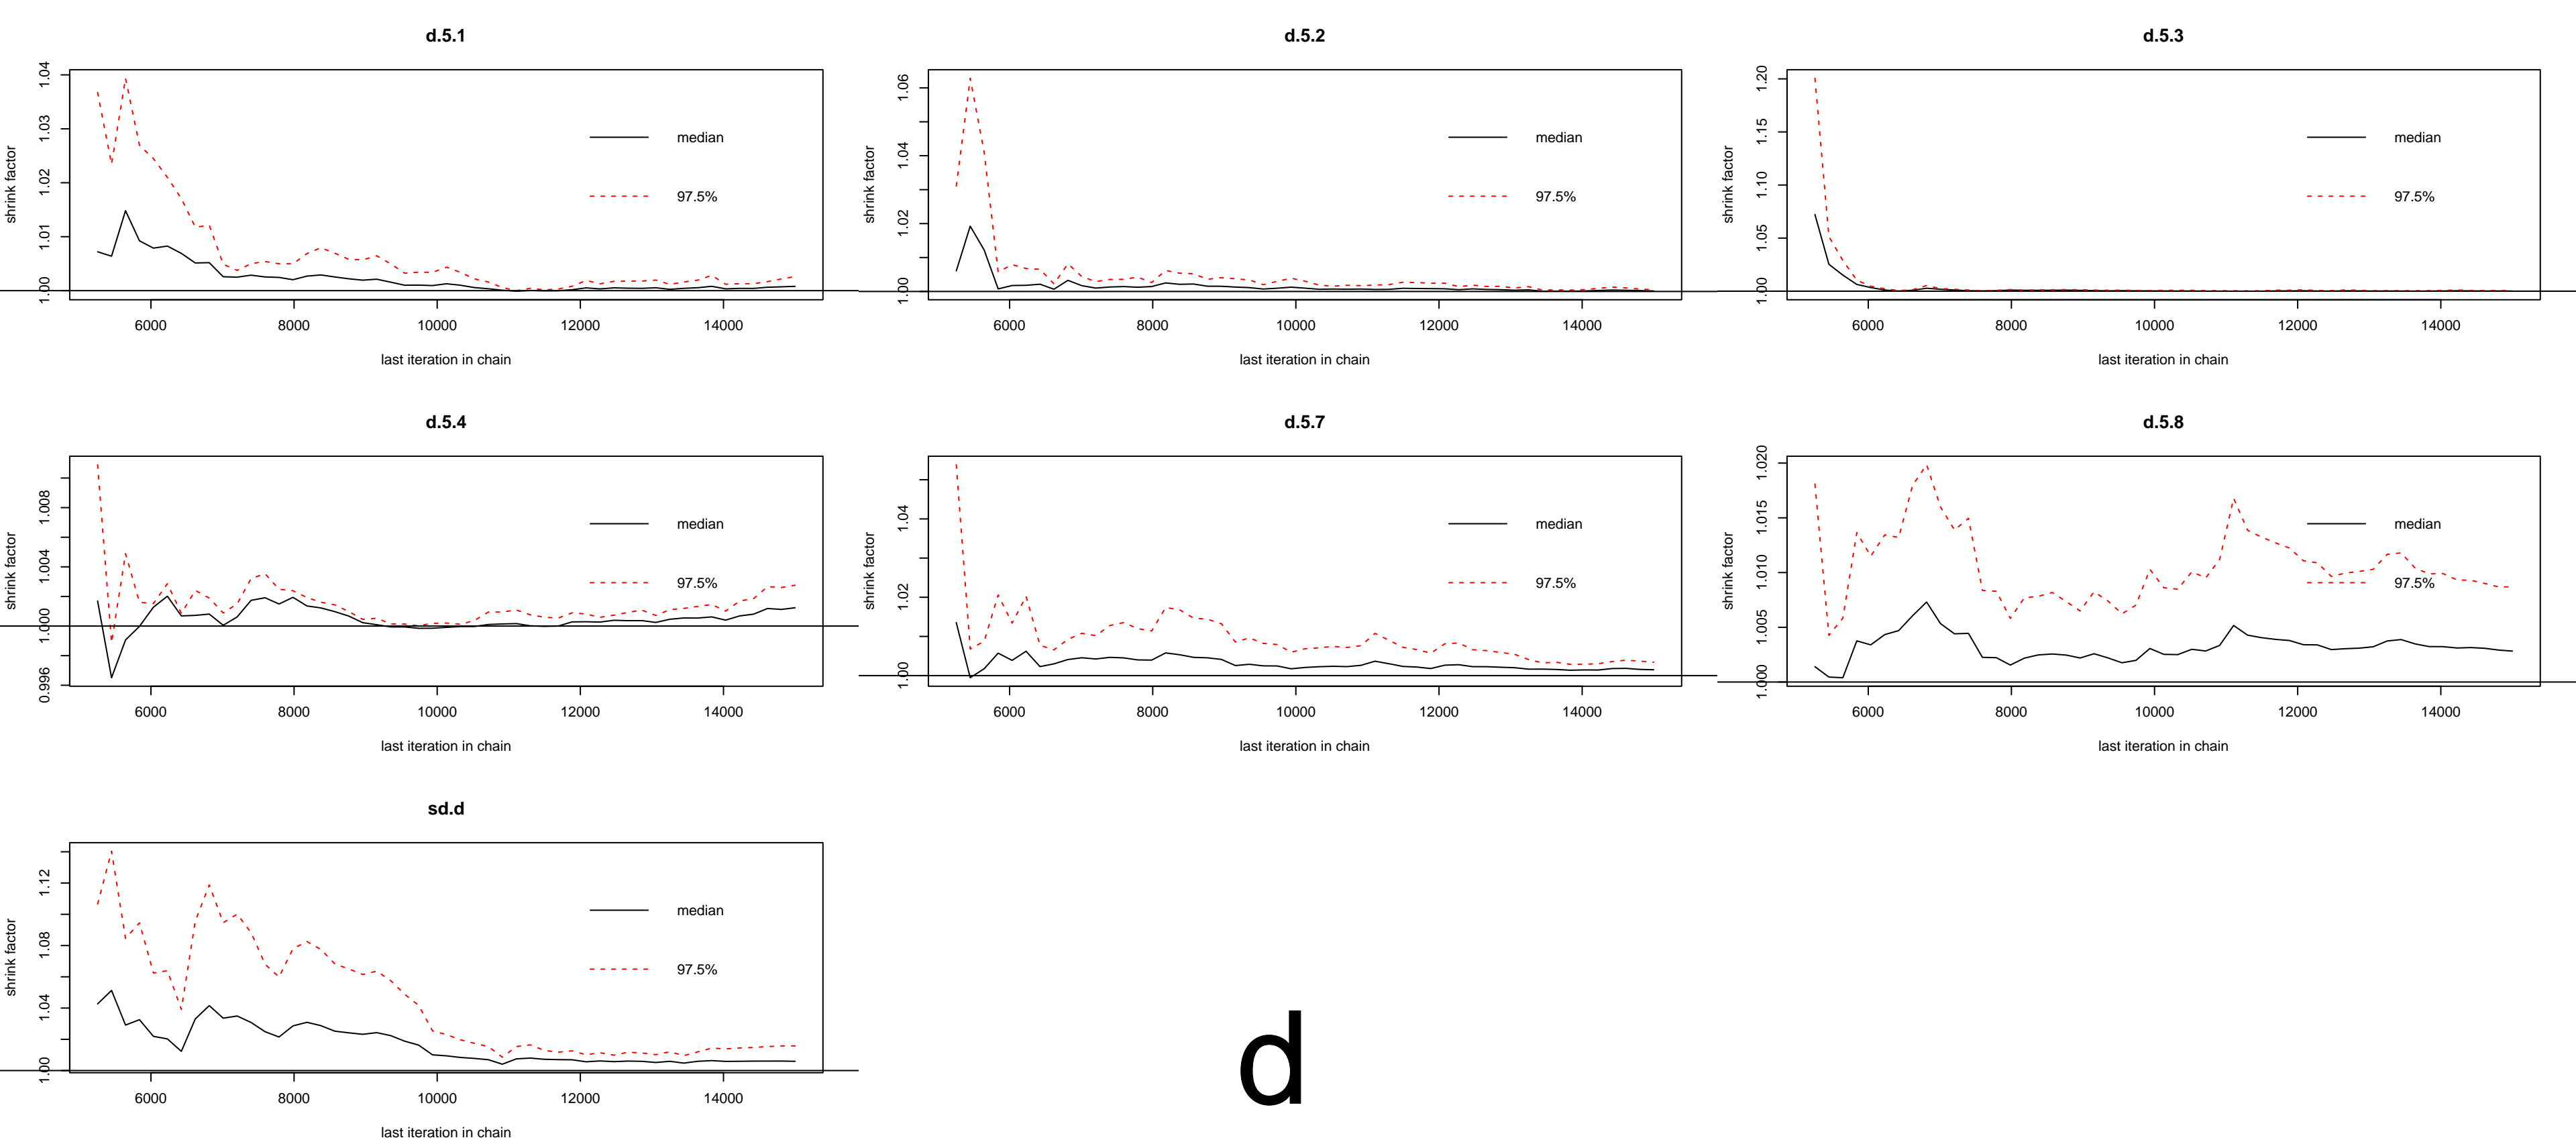

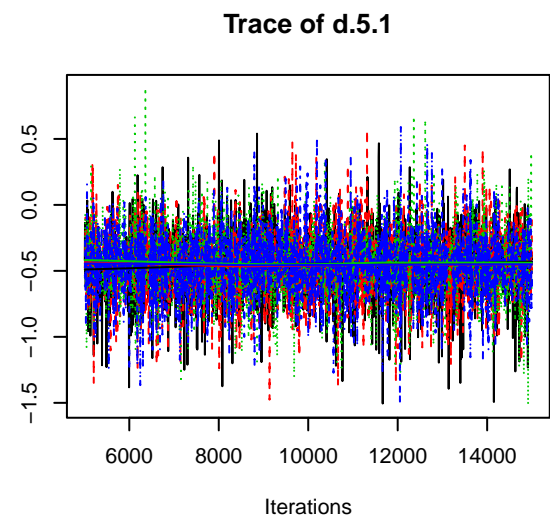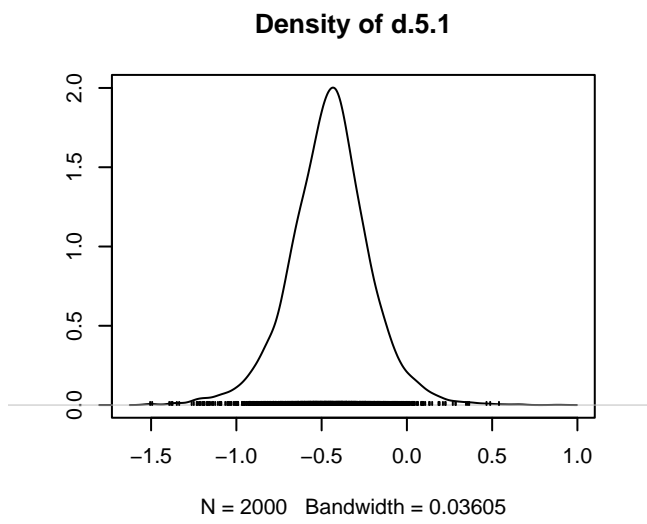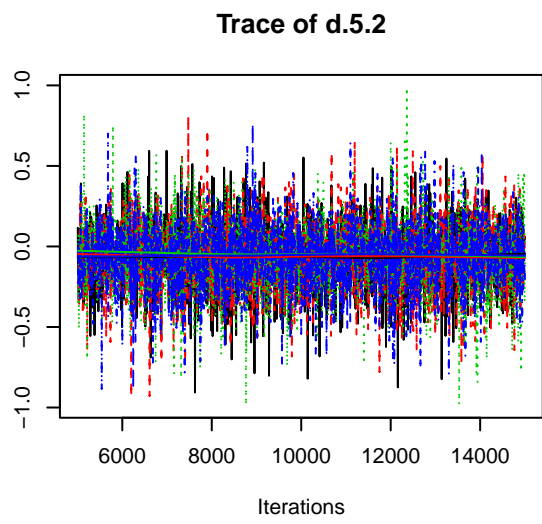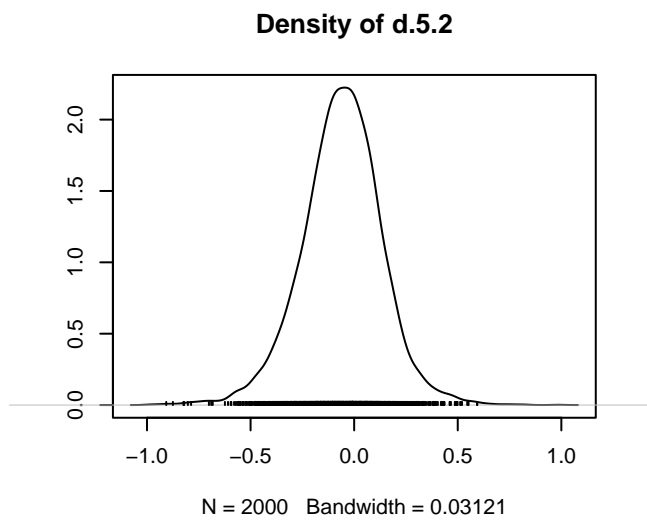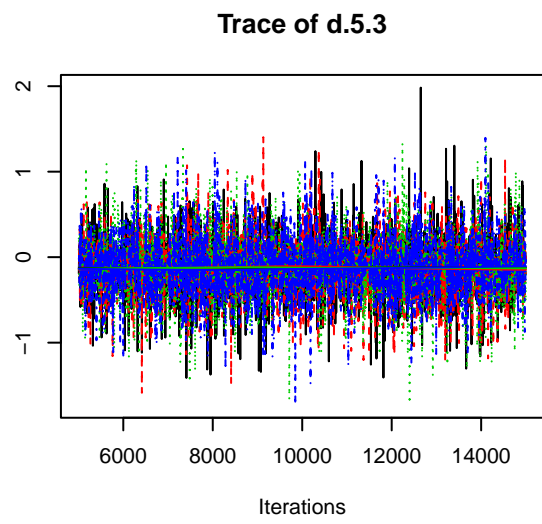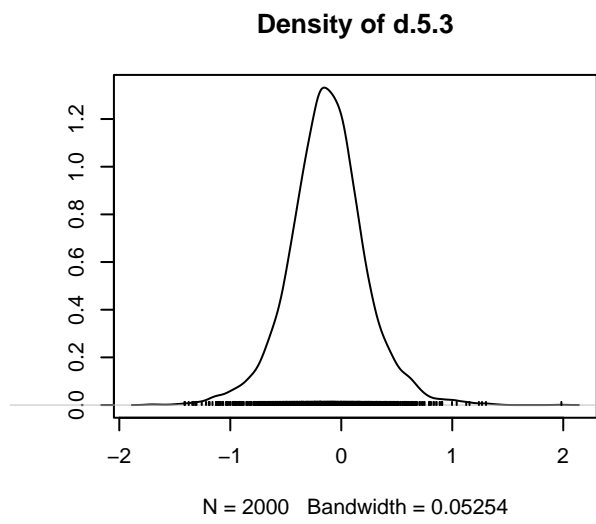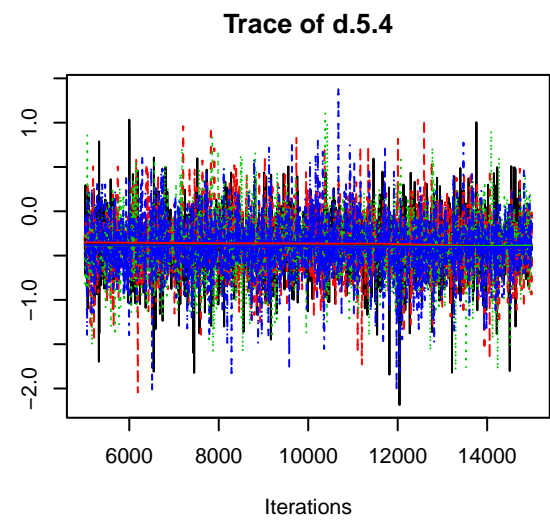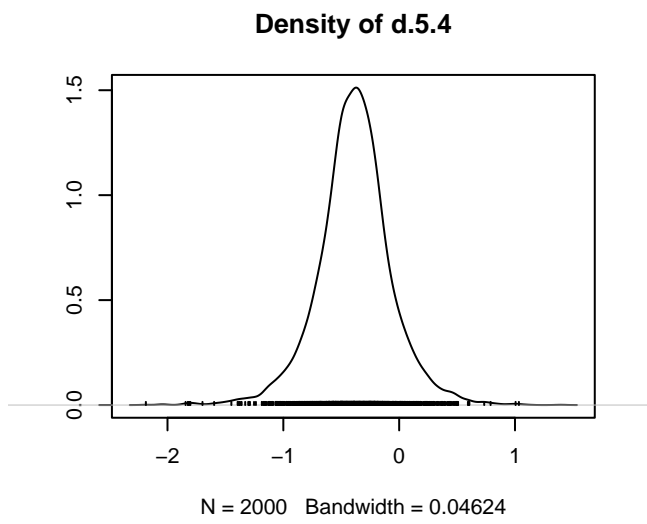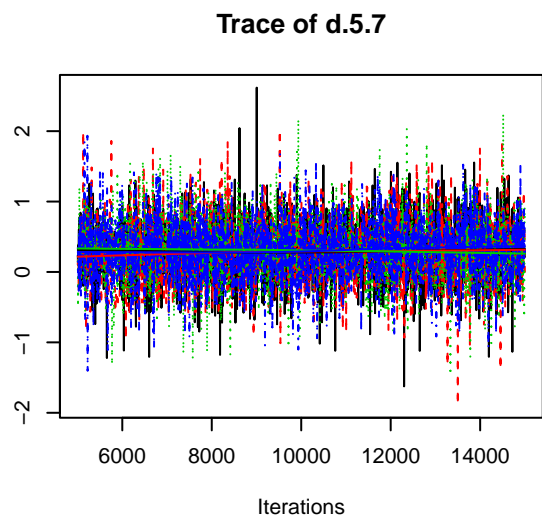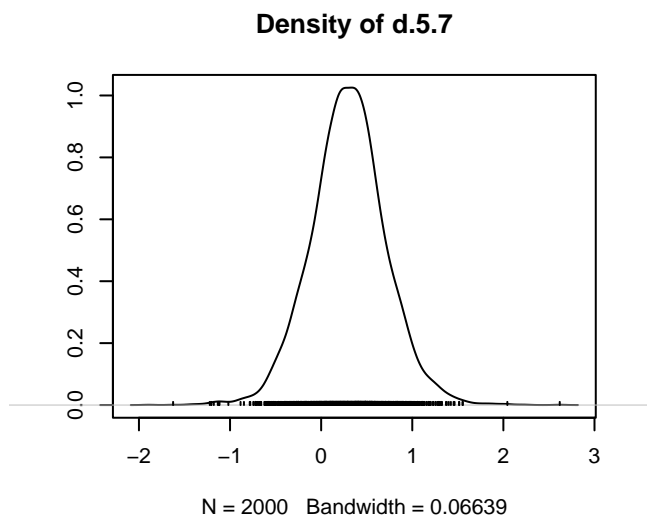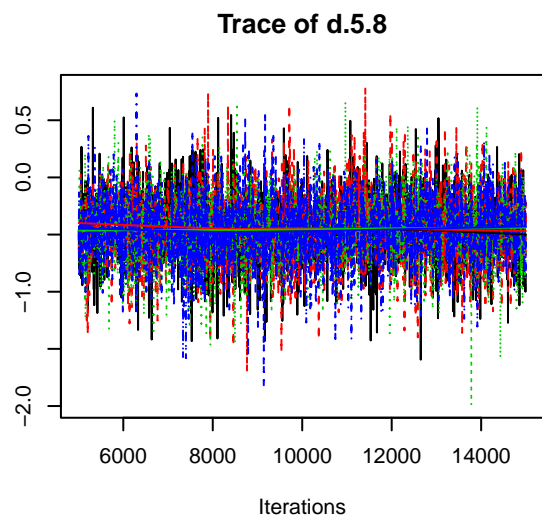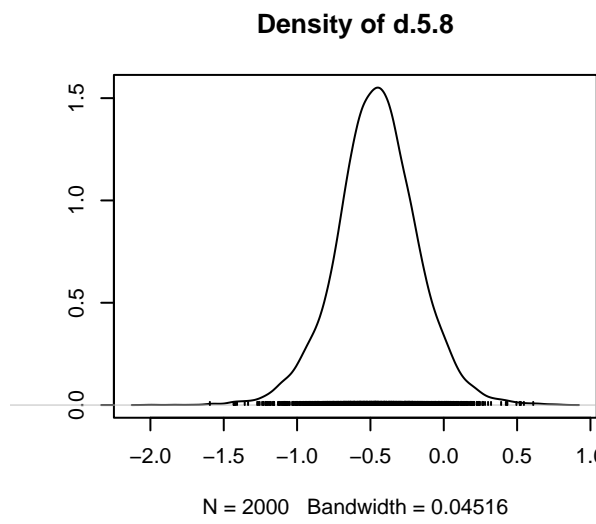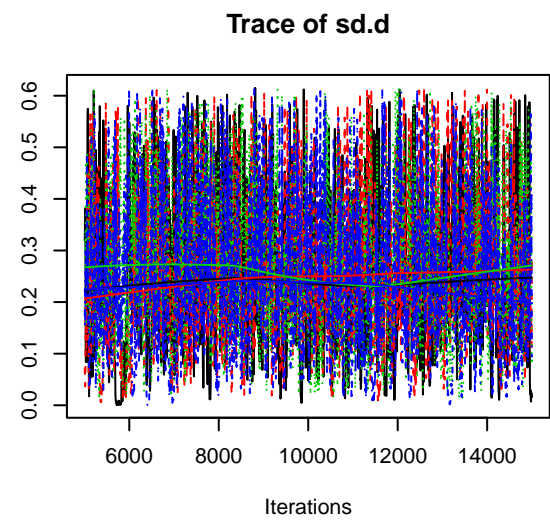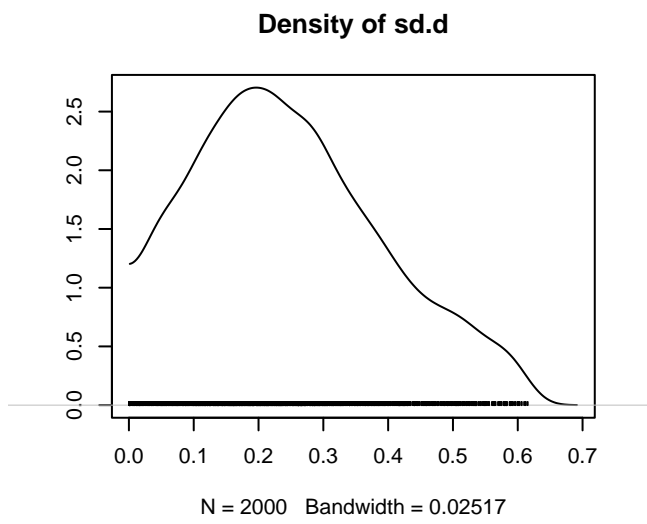

e

d.5.1

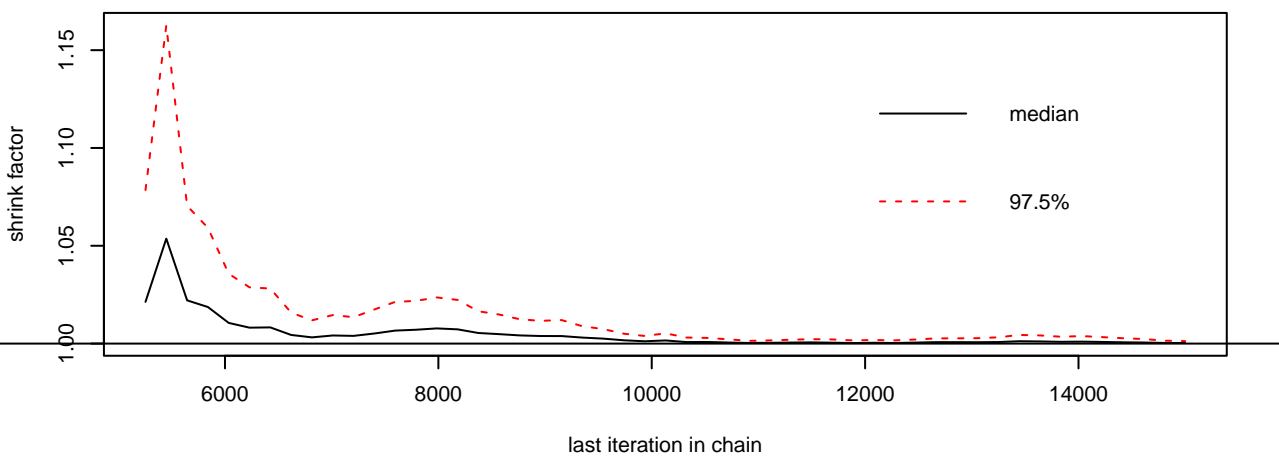

d.5.2

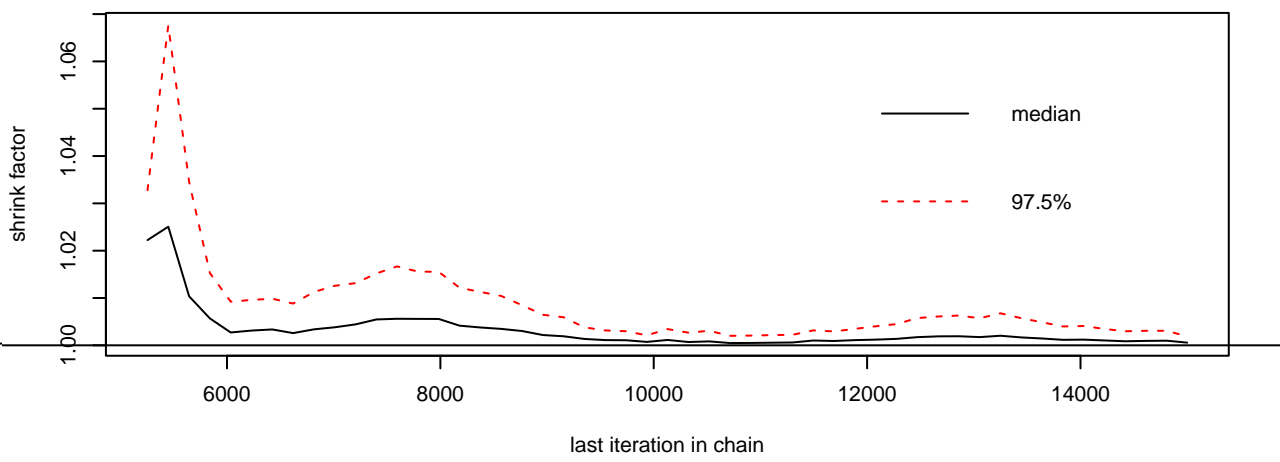

d.5.3

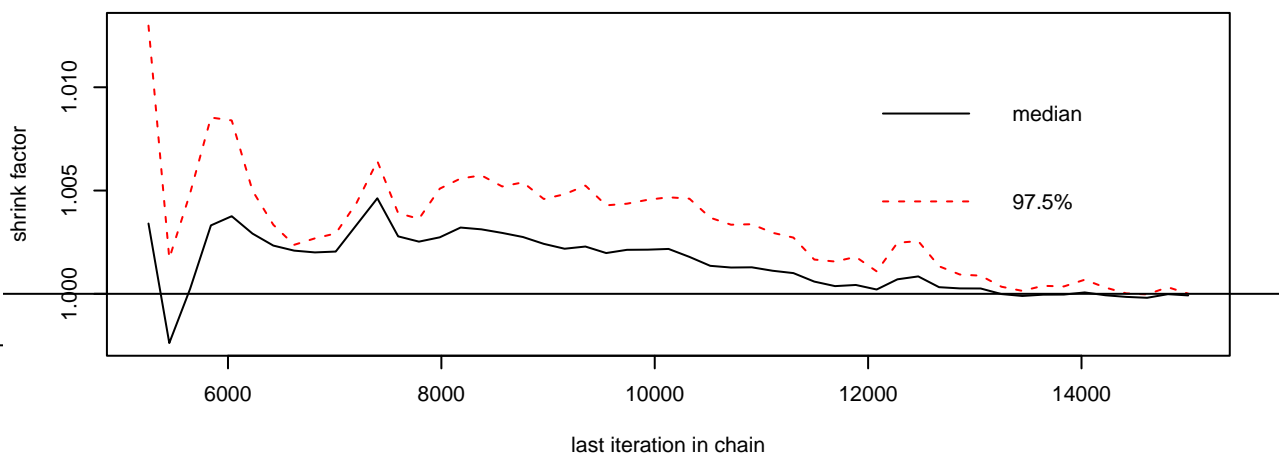

d.5.4

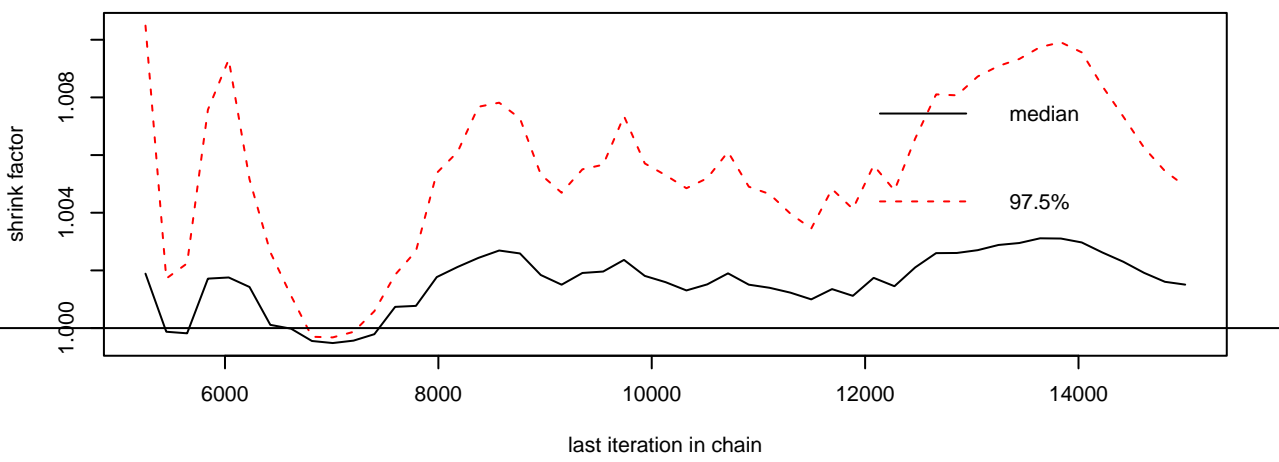

d.5.7

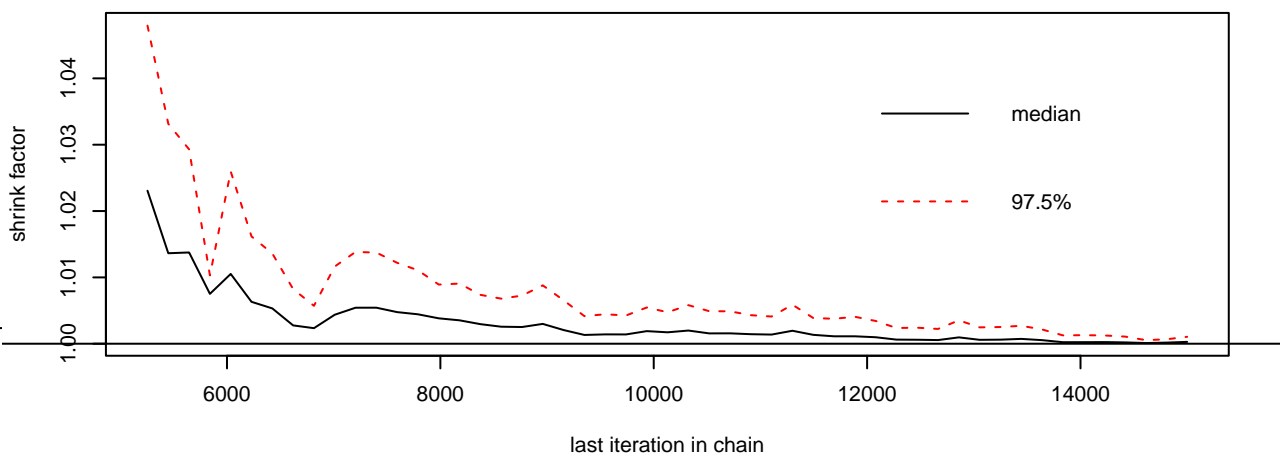

d.5.8

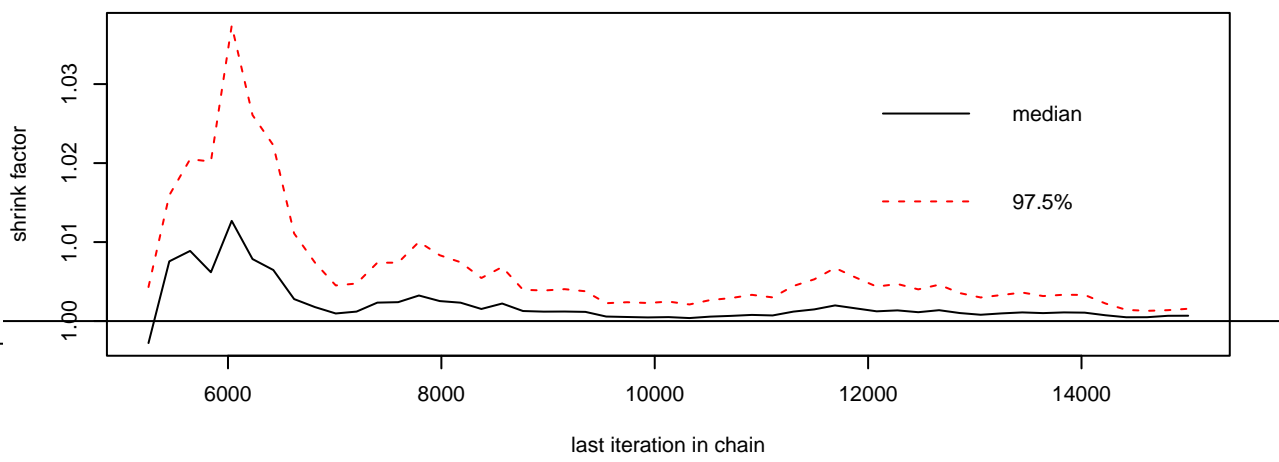

sd.d

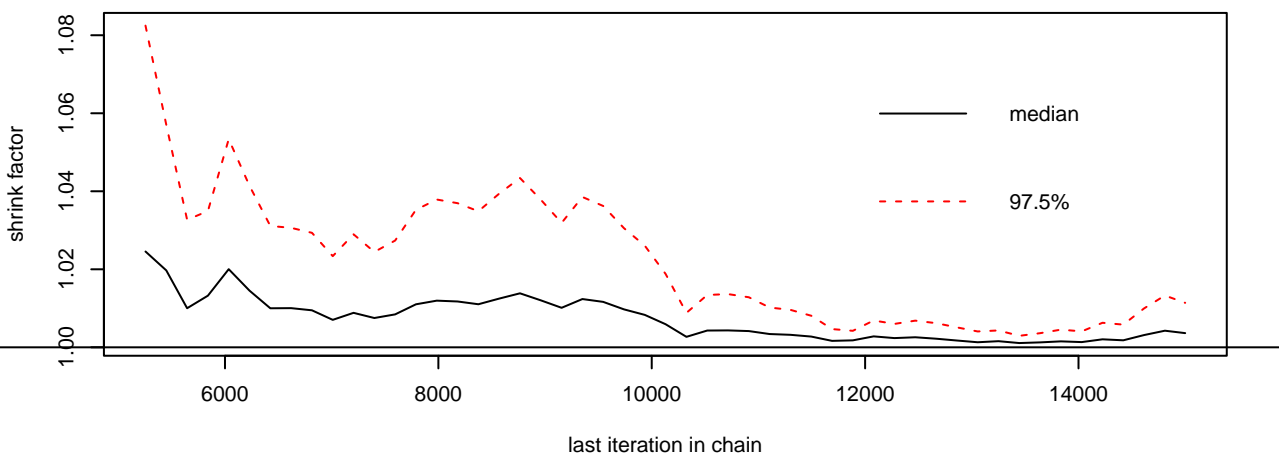

e

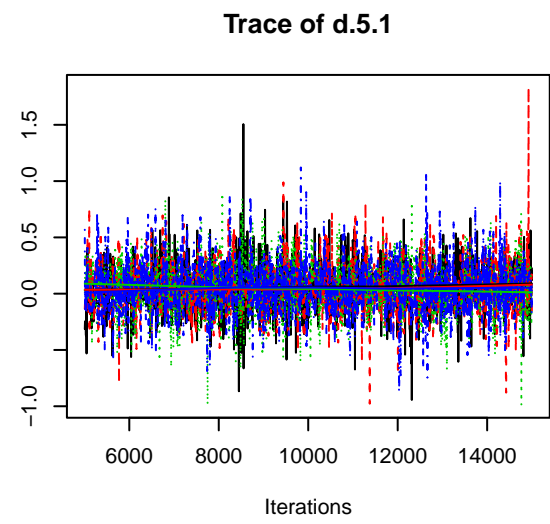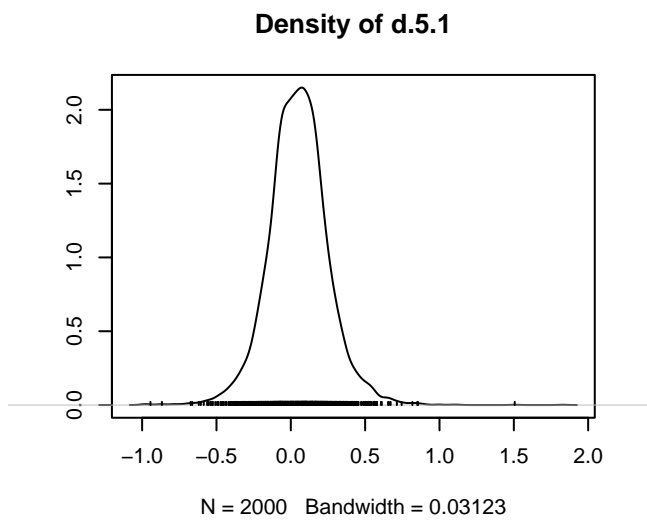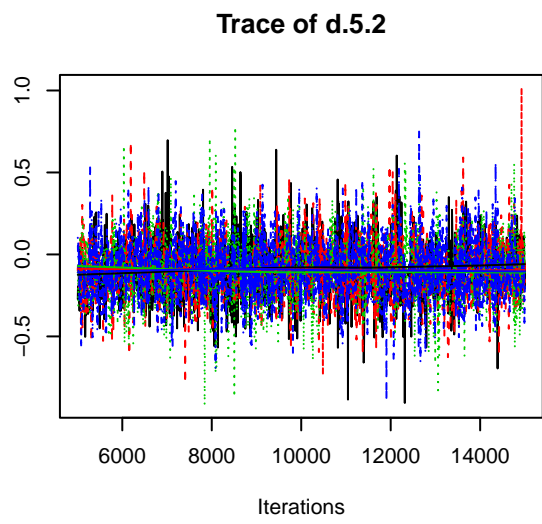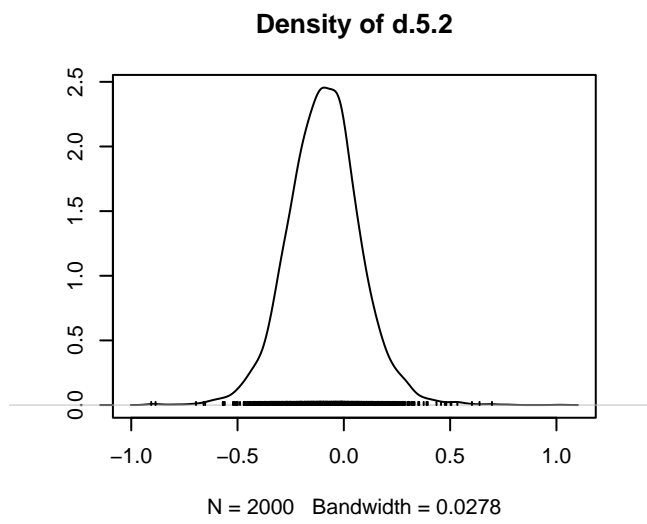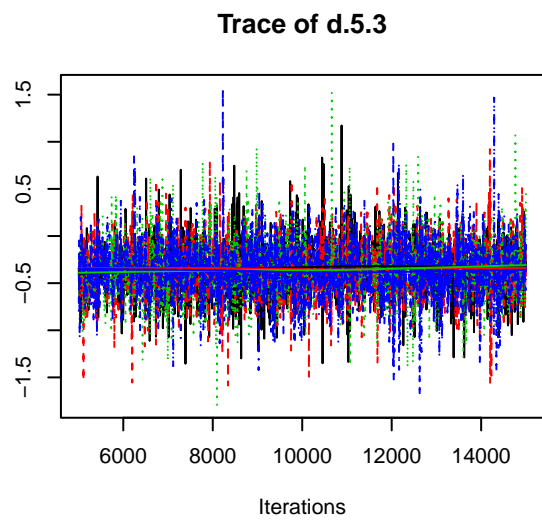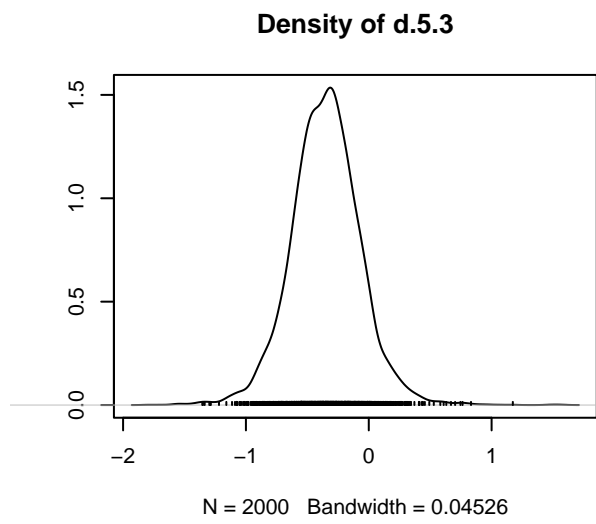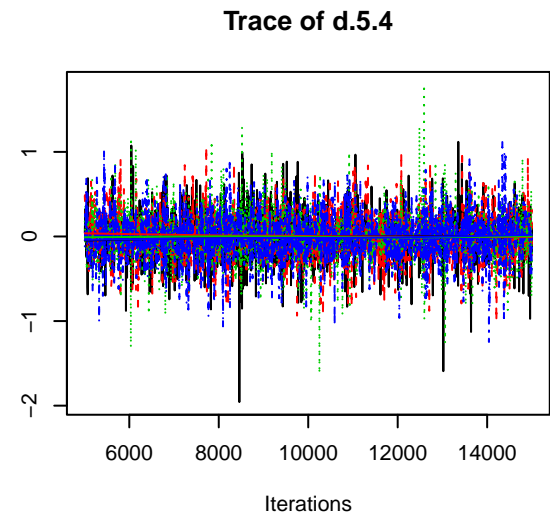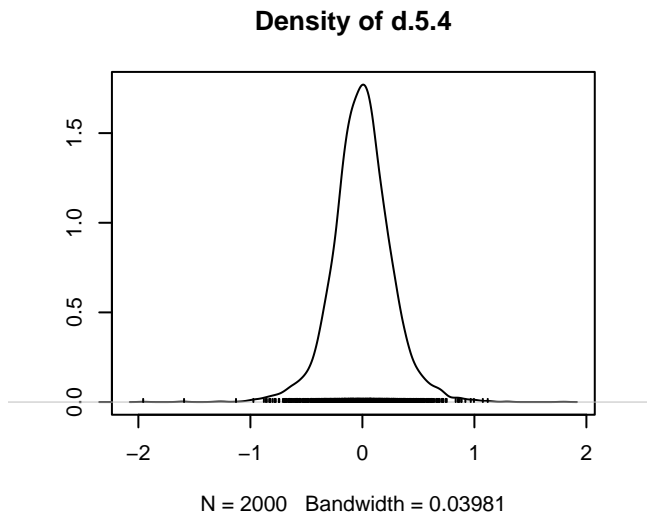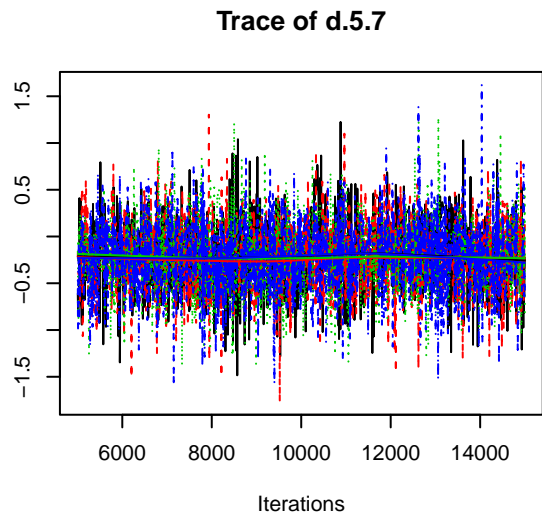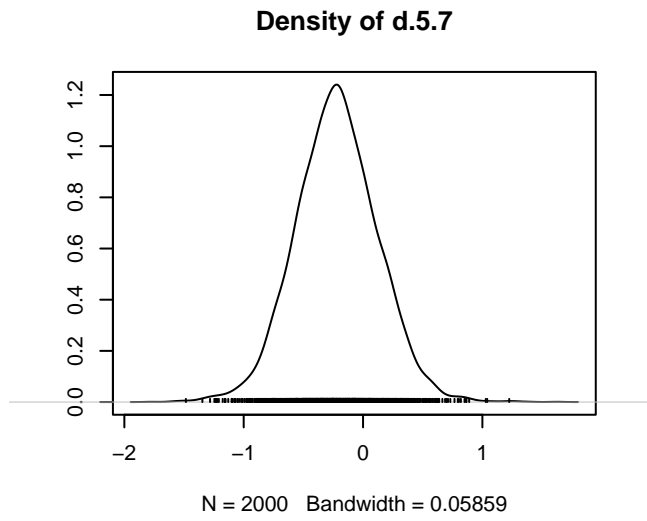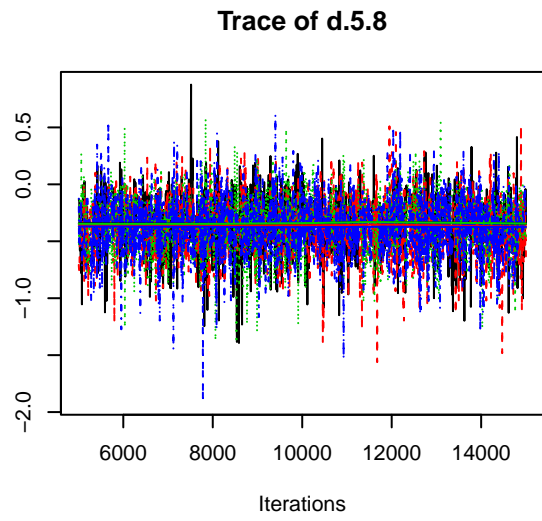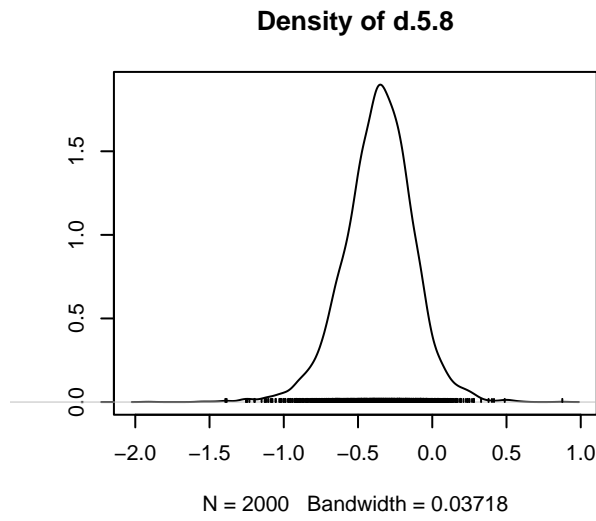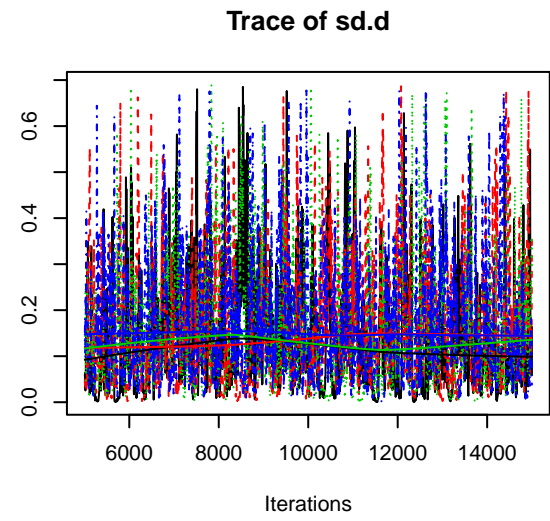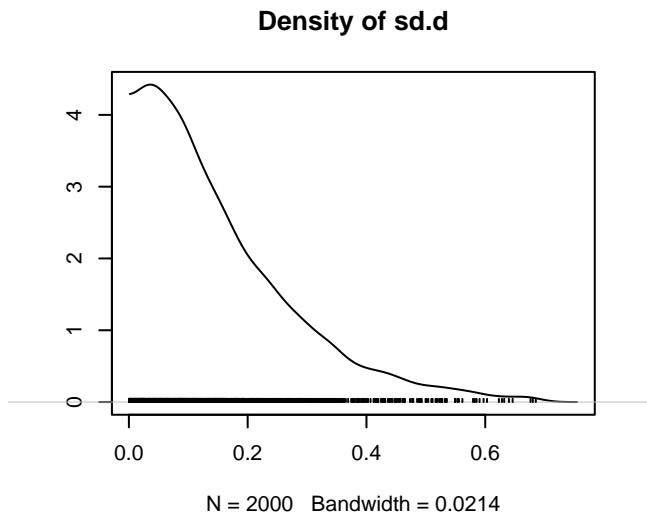

f



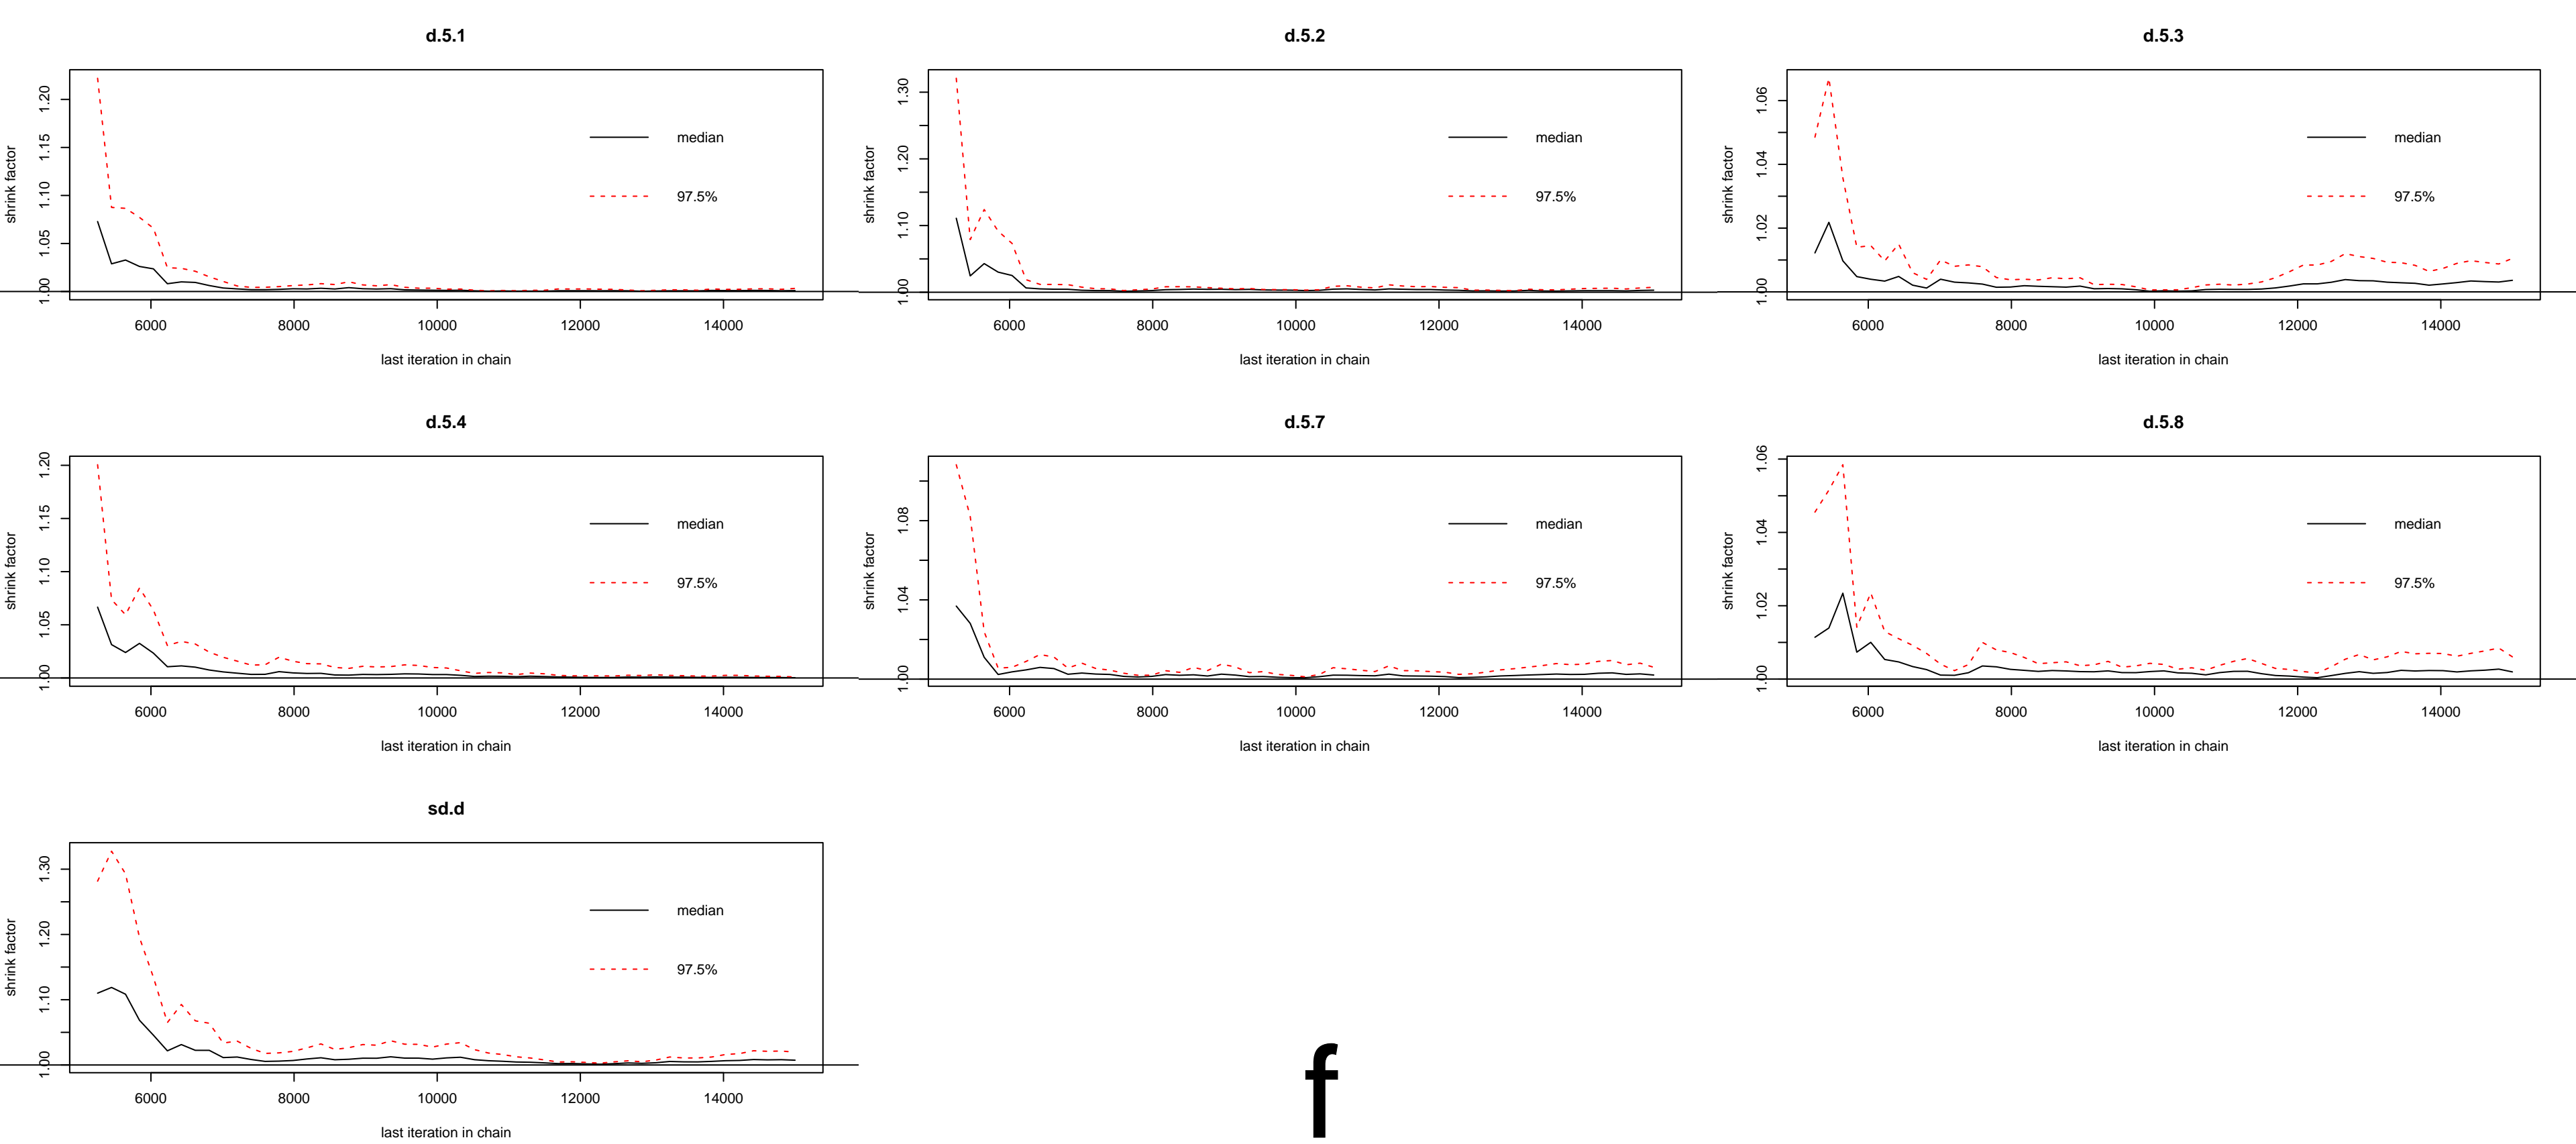

Supplement: f1 [file 9311875.f1.zip]
