# Supplementary material for: Front-Line Therapy in EGFR Exon 19 Deletion and 21 Leu858Arg Mutations in Advanced Non-Small Cell Lung Cancer: A Network Meta-Analysis
Source: Hindawi journal article supplement (doi:10.1155/2021/9311875), 2021-12-13

## **Figure S2 Bayesian ranking profiles of comparable treatments on efficacy for patients with non-small cell lung cancer.**

Profiles indicate the probability of each comparable treatment being ranked from first to last on progression free survival (PFS) and overall survival (OS). SoC: standard of care, represents first generation EGFR-TKIs in this network meta-analysis (including gefitinib, erlotinib and icotinib).

a. Afatinib; b. Chemotherapy; c. Dacomitinib; d. Osimertinib; e. SoC; f. SoC+Apatinib; g. SoC+Bevacizumab; h. SoC+Chemotherapy; i. SoC+Mono-chemotherapy; j. SoC+Ramucirumab

a

## Afatinib

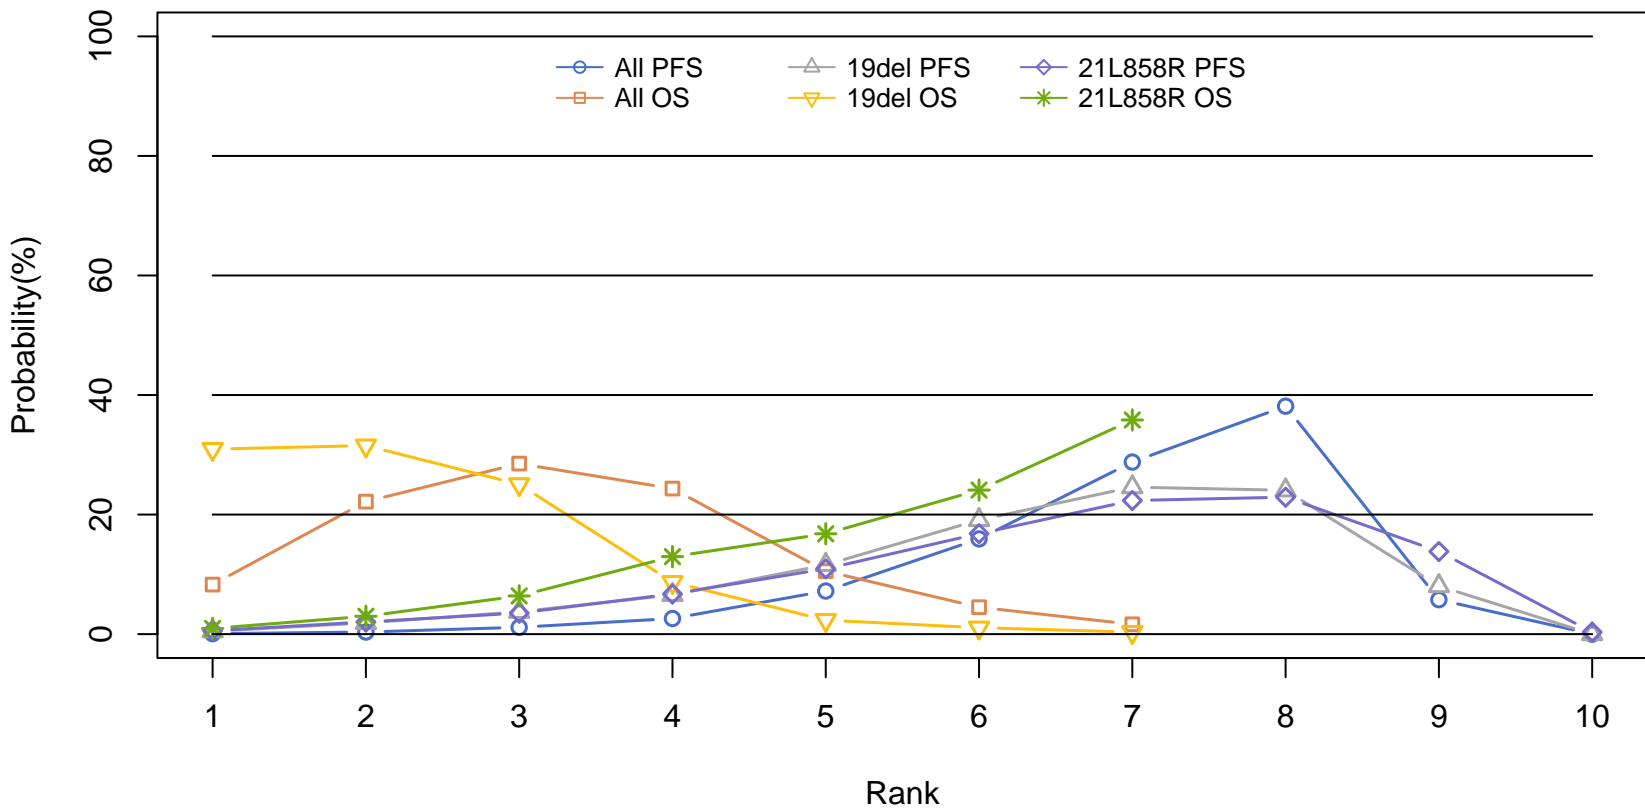

**b**

## Chemotherapy

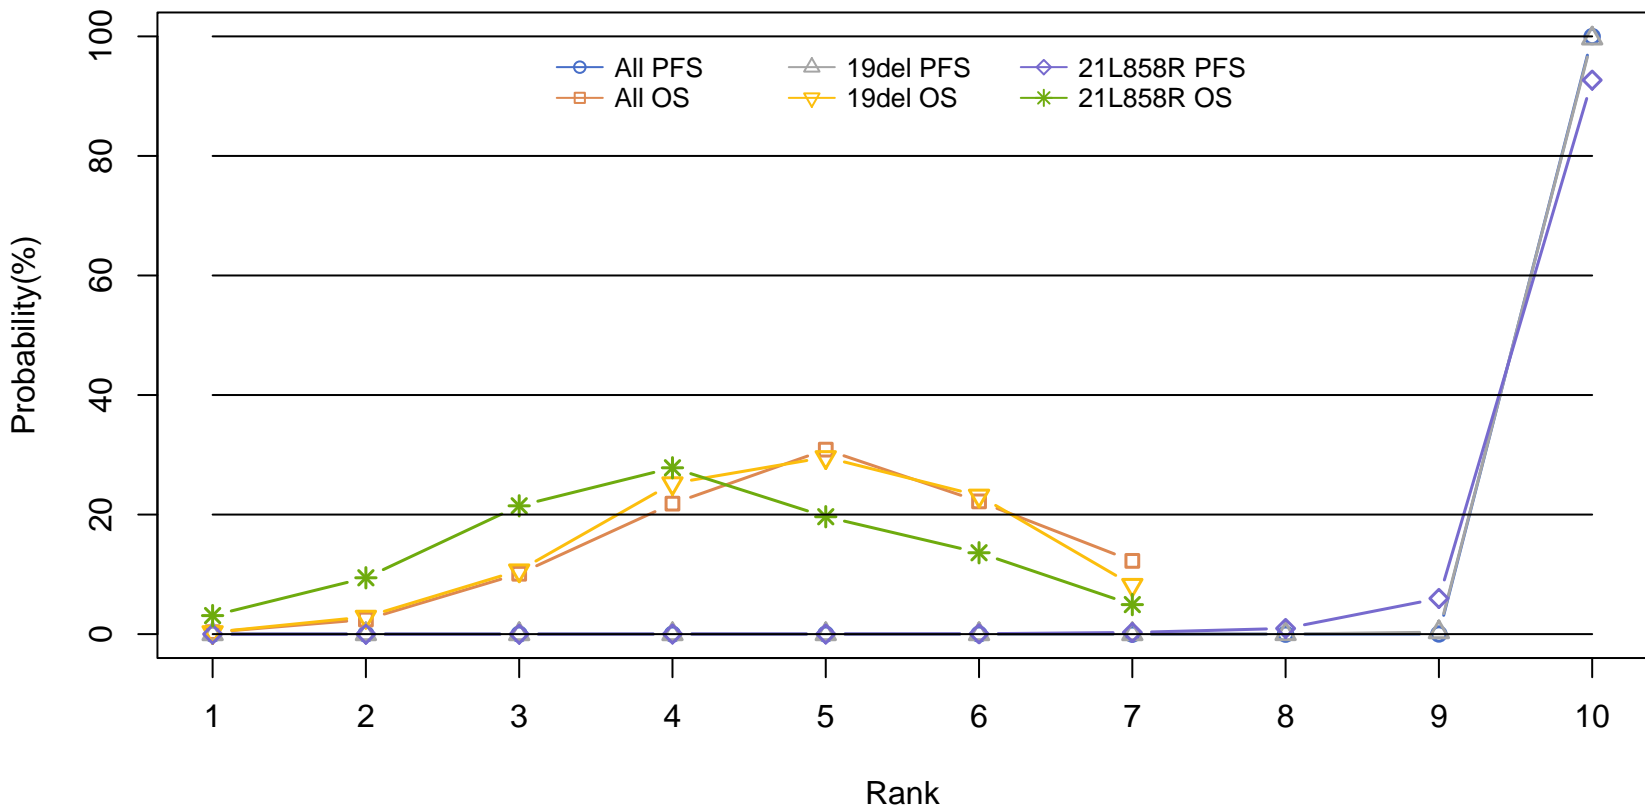

C

## Dacomitinib

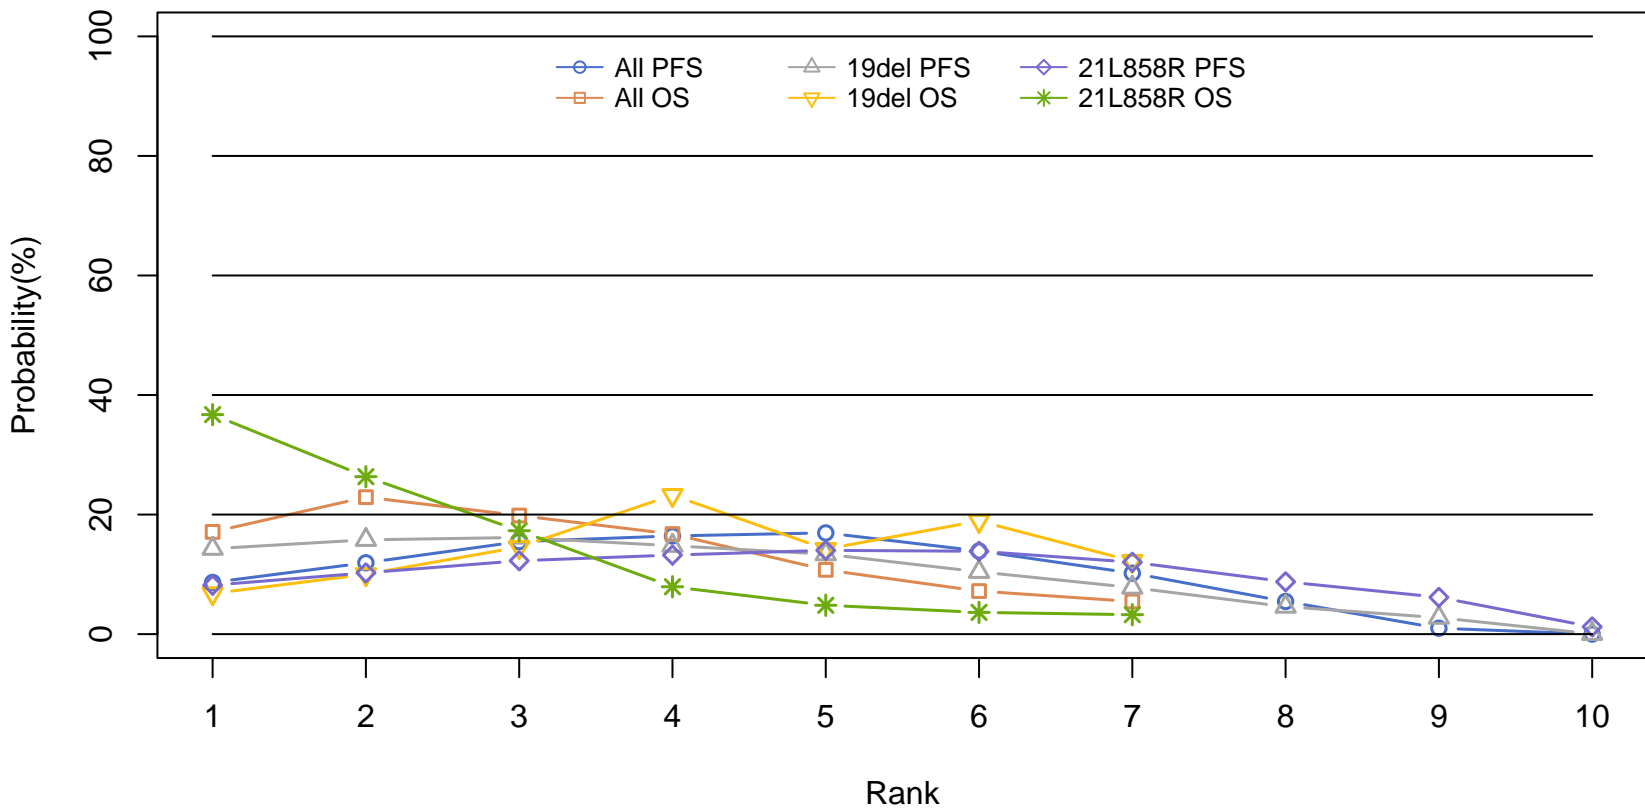

**d****Osimertinib**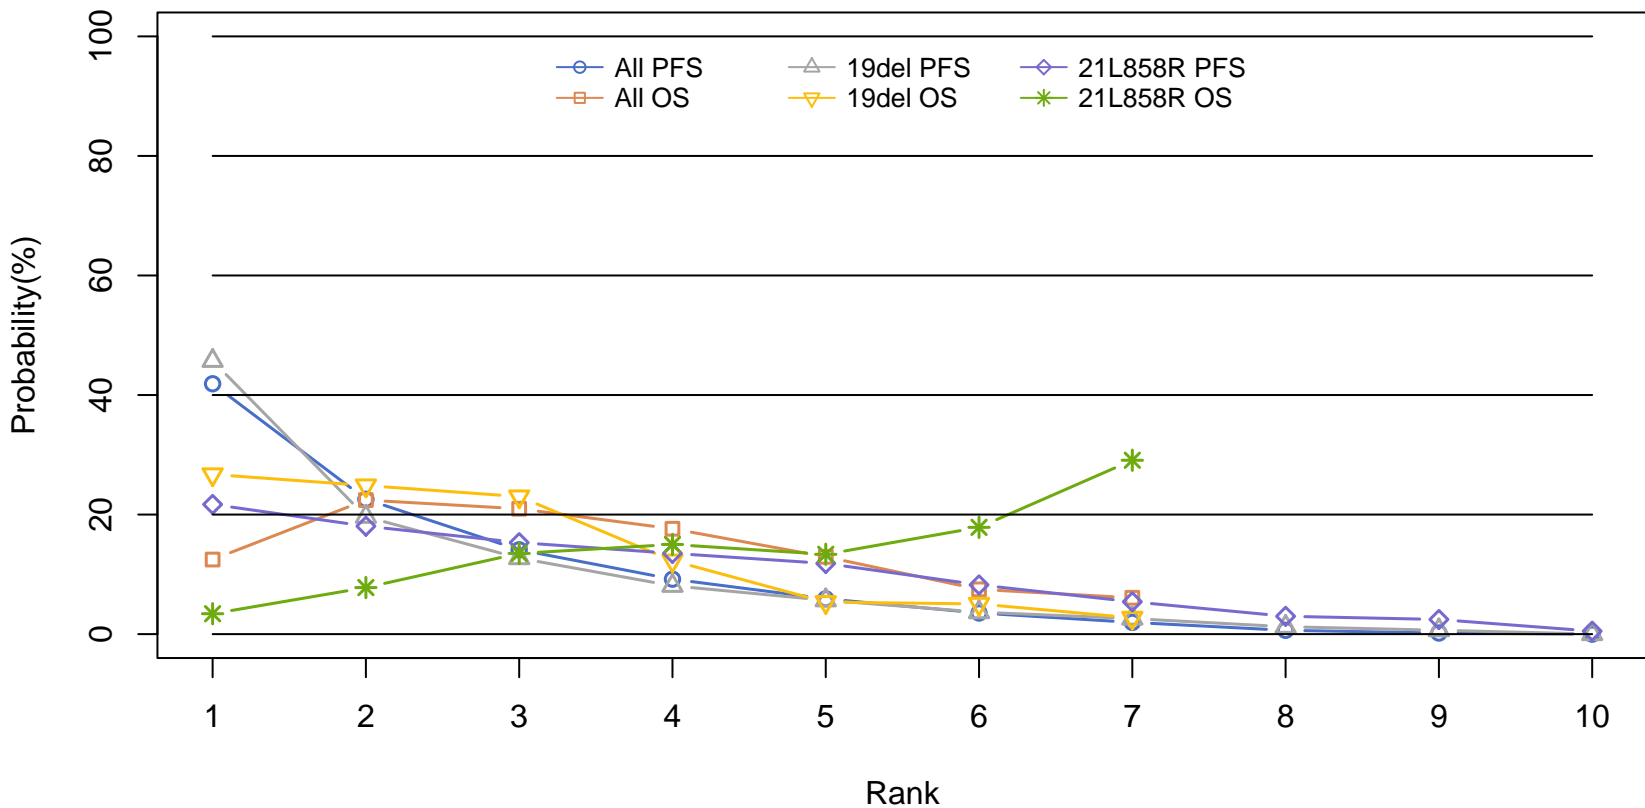

# SoC

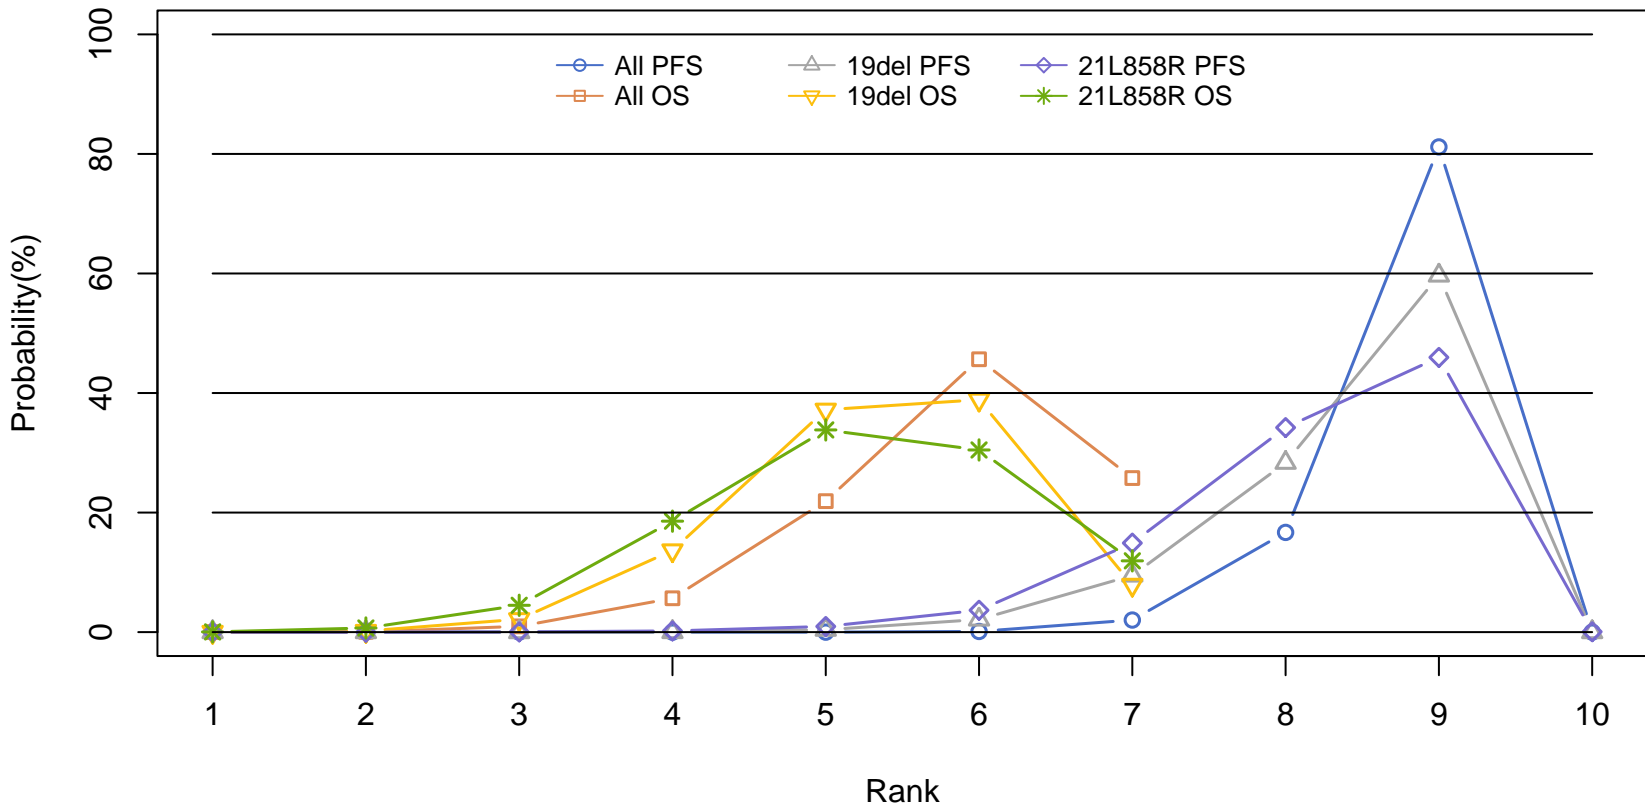

**f**

## SoC+Apatinib

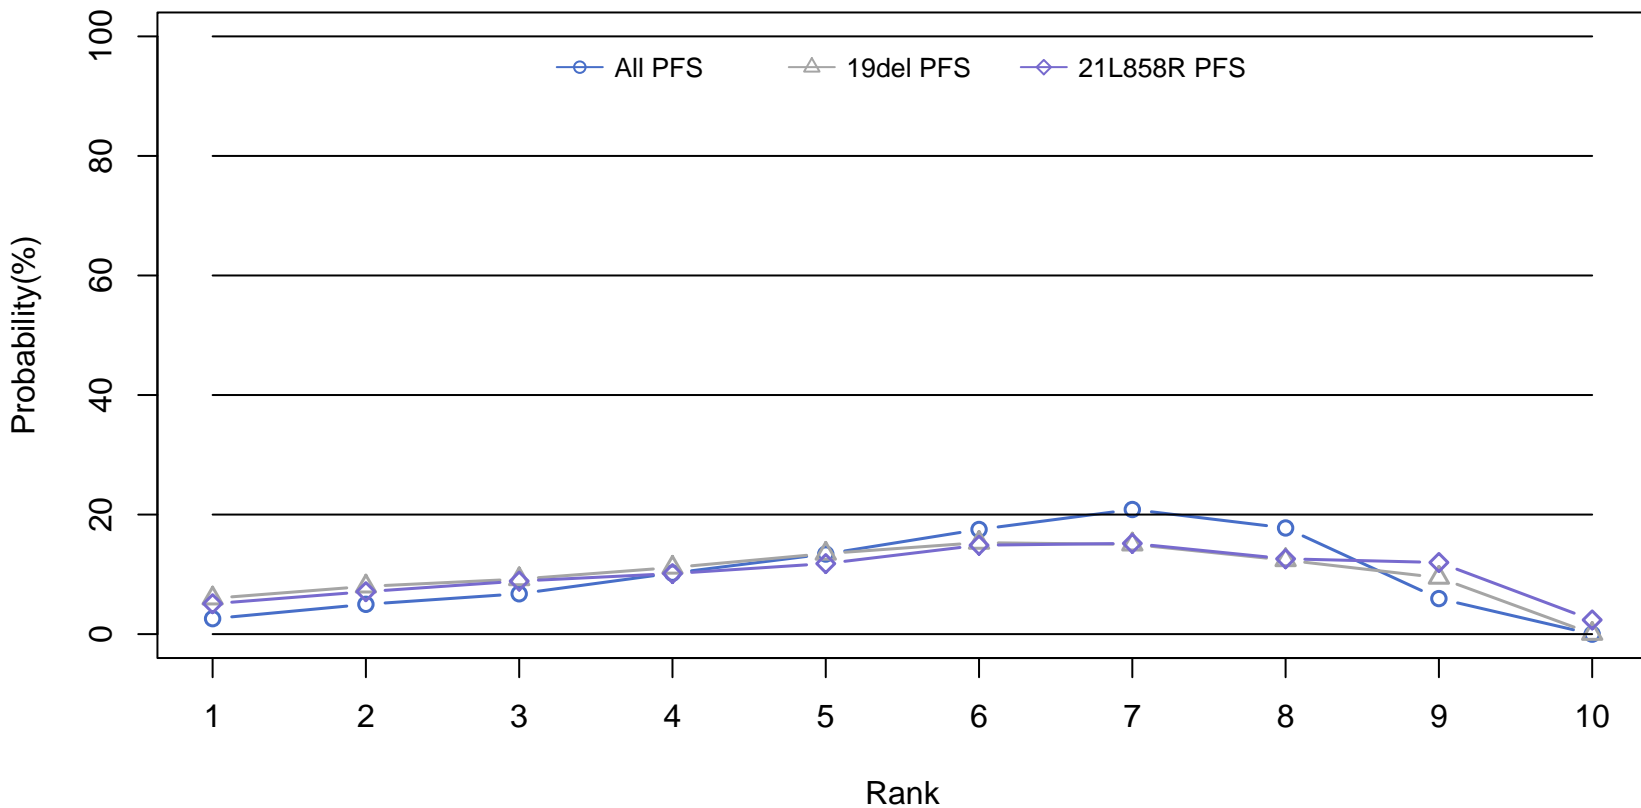

9

## SoC+Bevacizumab

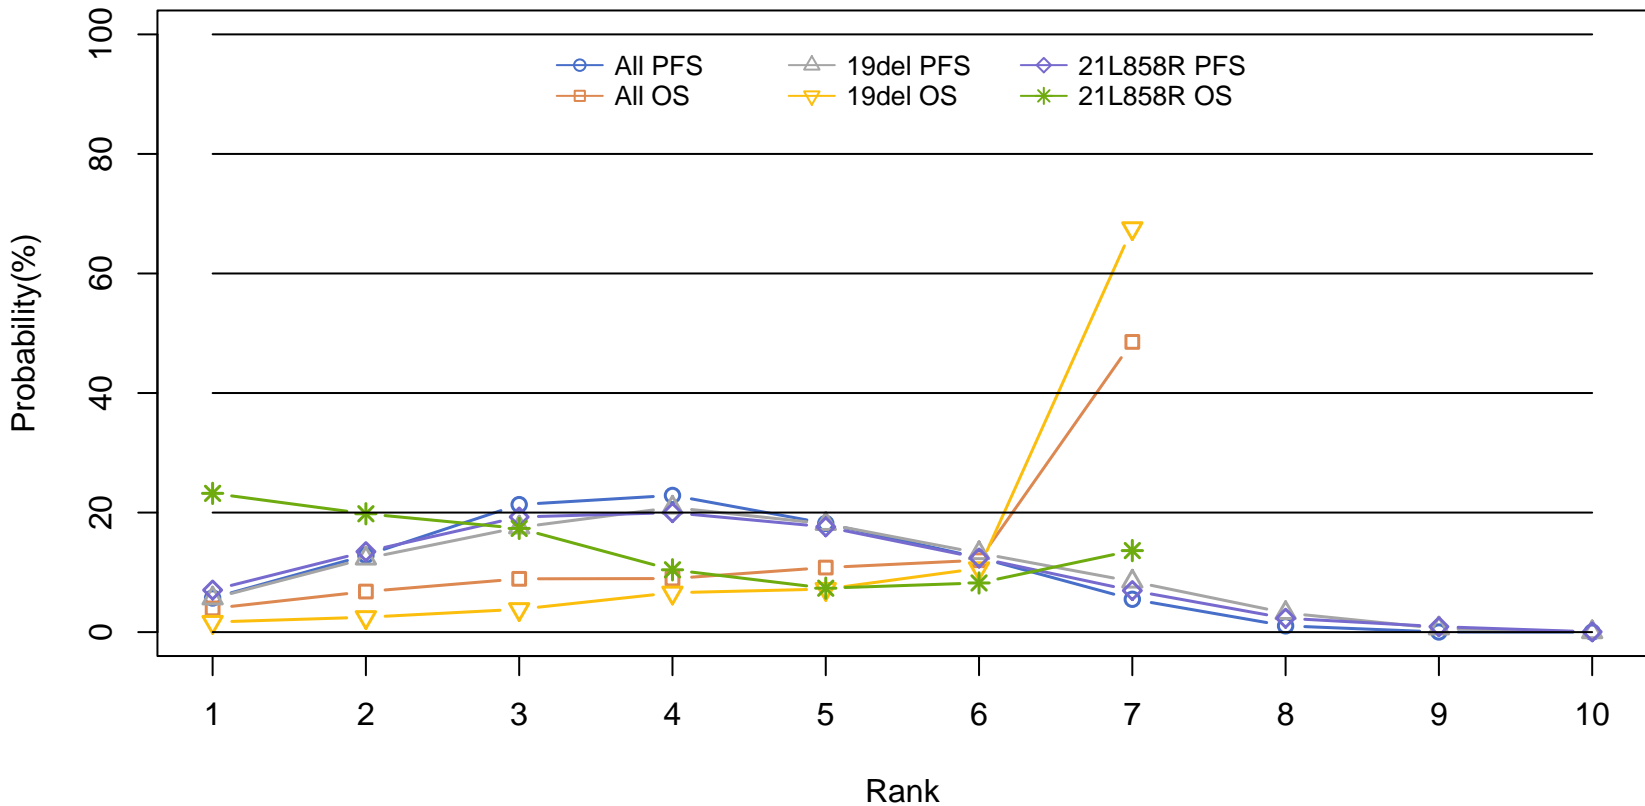



h

## SoC+Chemotherapy

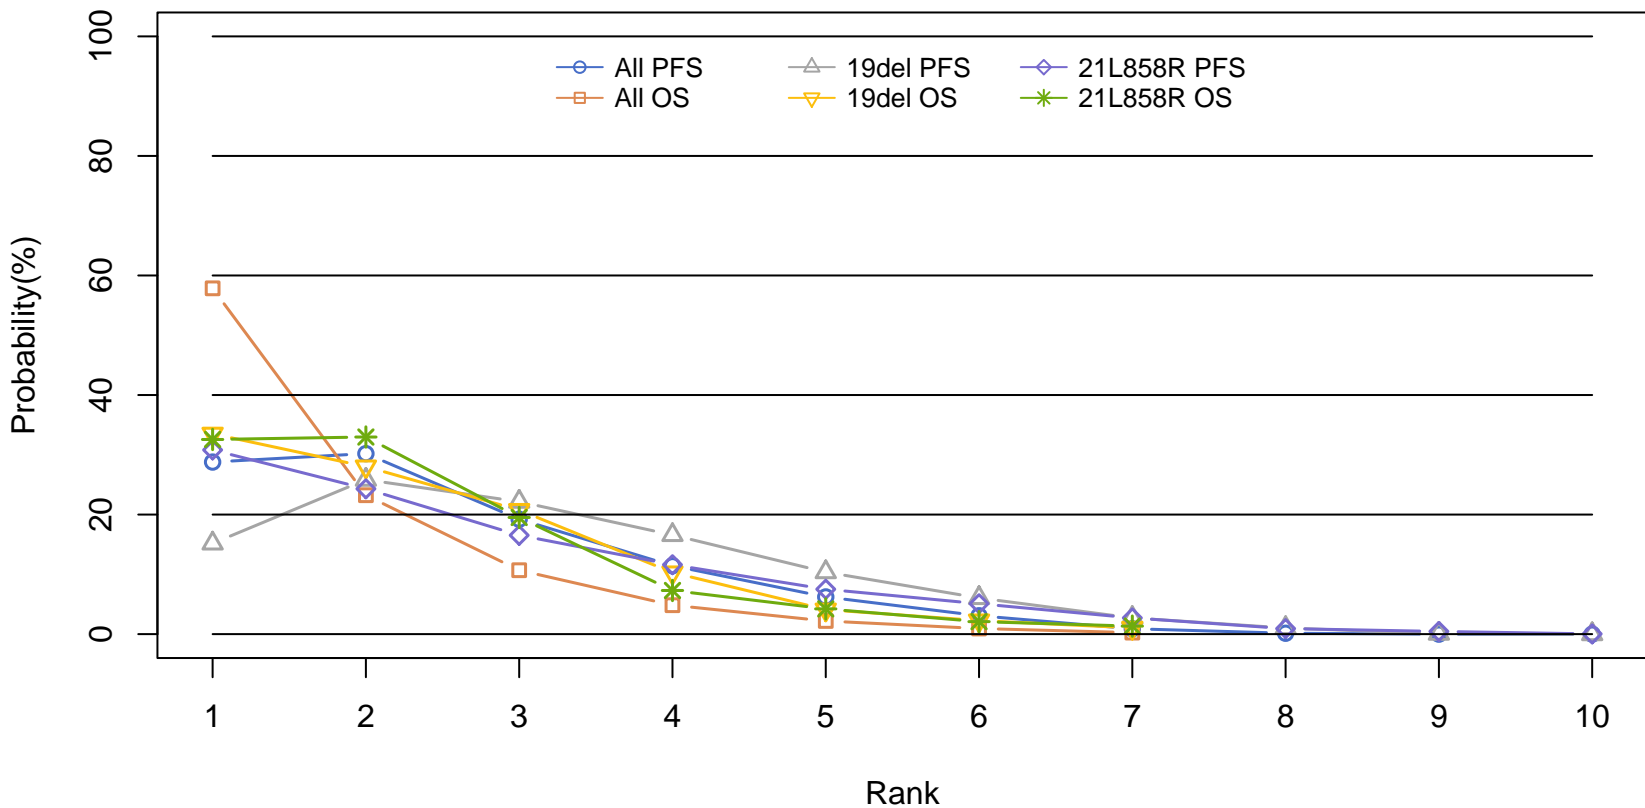

## SoC+Mono-chemotherapy

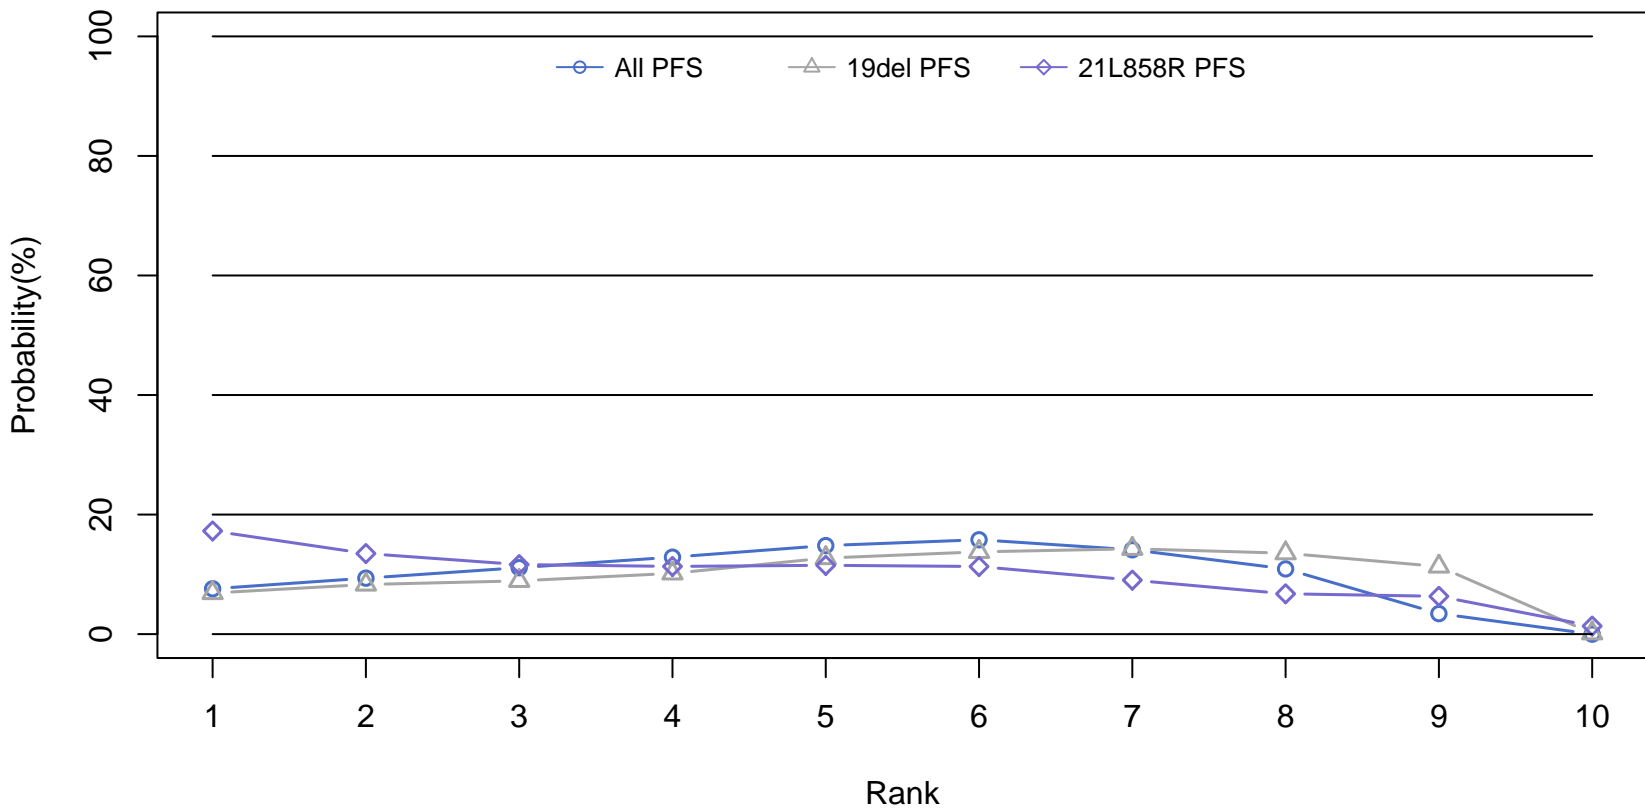

## SoC+Ramucirumab

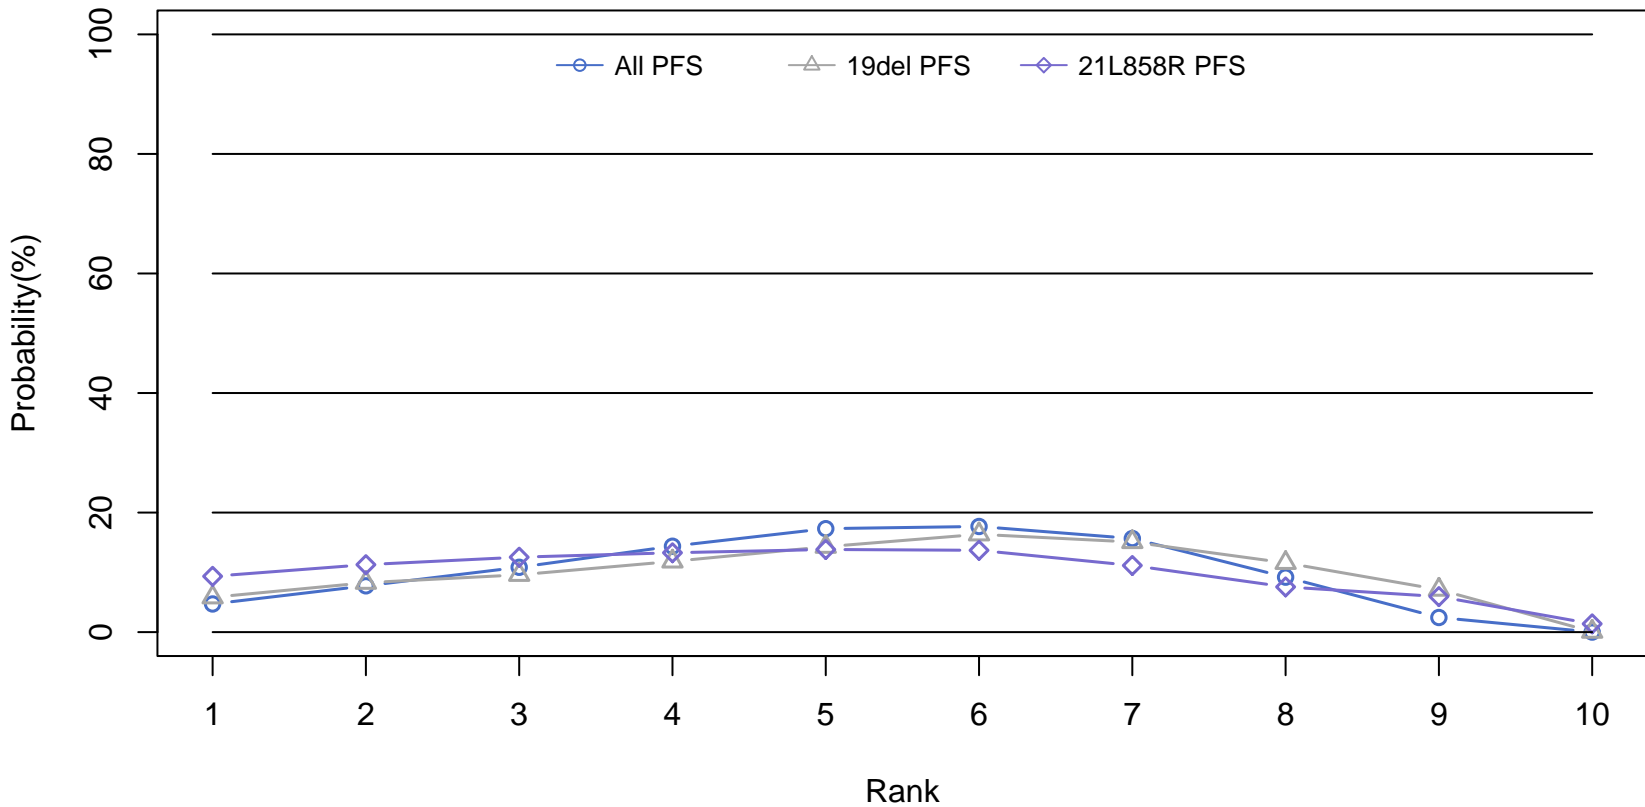

Supplement: f1 [file 9311875.f1.zip]
