# Supplementary material for: Front-Line Therapy in EGFR Exon 19 Deletion and 21 Leu858Arg Mutations in Advanced Non-Small Cell Lung Cancer: A Network Meta-Analysis
Source: Evid Based Complement Alternat Med. 2021 Dec 13;2021:9311875. doi: 10.1155/2021/9311875 (PMC8687779; doi:10.1155/2021/9311875)
Supplement: Supplementary Materials — There are 4 supplementary tables and 2 supplementary figures for this paper. [file 9311875.f1.zip]

Archive with 6 entries (6 files):
- 9311875.f1/FigureS1 (1).pdf
- 9311875.f1/FigureS2 (1).pdf
- 9311875.f1/TableS1.pdf
- 9311875.f1/TableS2.docx
- 9311875.f1/TableS3.docx
- 9311875.f1/TableS4.docx
